## 1 Redefining Interleukin 11 as a regeneration-limiting hepatotoxin

2  
3  
4  
5 **Authors:** Anissa A. Widjaja<sup>1†</sup>, Jinrui Dong<sup>1†</sup>, Eleonora Adami<sup>1</sup>, Sivakumar Viswanathan<sup>1</sup>,  
6 Benjamin Ng<sup>1,2</sup>, Brijesh K. Singh<sup>1</sup>, Wei Wen Lim<sup>2</sup>, Jin Zhou<sup>1</sup>, Leroy S. Pakkiri<sup>3</sup>, Shamini G.  
7 Shekeran<sup>1</sup>, Jessie Tan<sup>1,2</sup>, Sze Yun Lim<sup>2</sup>, Mao Wang<sup>1</sup>, Robert Holgate<sup>4</sup>, Arron Hearn<sup>4</sup>, Paul M.  
8 Yen<sup>1</sup>, Sonia P. Chothani<sup>1</sup>, Leanne E. Felkin<sup>5</sup>, James W. Dear<sup>6</sup>, Chester L. Drum<sup>7,8,9</sup>, Sebastian  
9 Schafer<sup>1,2</sup>, Stuart A. Cook<sup>1,2,5,10\*</sup>

10  
11 †These authors contributed equally to this work.

12 \*Corresponding author

### 13 14 15 **Affiliations:**

16 <sup>1</sup>Cardiovascular and Metabolic Disorders Program, Duke-National University of Singapore  
17 Medical School, Singapore.

18 <sup>2</sup>National Heart Research Institute Singapore, National Heart Centre Singapore, Singapore.

19 <sup>3</sup>Cardiac Department, National University Hospital, Singapore.

20 <sup>4</sup>Abzena, Babraham Research Campus, Babraham, Cambridge, UK

21 <sup>5</sup>National Heart and Lung Institute, Imperial College London, London, UK.

22 <sup>6</sup>Pharmacology, Toxicology and Therapeutics, Centre for Cardiovascular Science, University of  
23 Edinburgh, UK.

24 <sup>7</sup>Cardiovascular Research Institute, National University Health System, Singapore.

25 <sup>8</sup>Department of Medicine, Yong Loo Lin School of Medicine, National University of Singapore

26 <sup>9</sup>Department of Surgery, Yong Loo Lin School of Medicine, National University of Singapore

27 <sup>10</sup>MRC-London Institute of Medical Sciences, Hammersmith Hospital Campus, London, UK

28  
29  
30 **Correspondence to:** [stuart.cook@duke-nus.edu.sg](mailto:stuart.cook@duke-nus.edu.sg)

31 Stuart A. Cook

32 8 College Road 169857

33 Duke-NUS Medical School, Singapore

34 Phone: (65) 660102584

35 Fax: (65) 6221 2534

36

## 37 **Abstract**

38 Acetaminophen (APAP) overdose is a leading cause of untreatable liver failure. In the mouse  
39 model of APAP-induced liver injury (AILI), the administration of recombinant human  
40 interleukin 11 (rhIL11) is protective. Here we show that the beneficial effect of rhIL11 in the  
41 mouse is due to its unexpected and paradoxical inhibition of endogenous mouse IL11 activity.  
42 Contrary to the accepted paradigm IL11 is a potent hepatotoxin across species, which is secreted  
43 from damaged hepatocytes to drive an autocrine loop of NOX4 and JNK-dependent apoptosis.  
44 Mice with hepatocyte-specific *Il11* expression spontaneously develop liver failure whereas those  
45 with *Il11ral* deletion are remarkably protected from AILI. Neutralizing anti-IL11R antibodies  
46 administered to moribund mice 10 hours following a lethal APAP overdose results in 90%  
47 survival that is associated with very large liver regeneration. Our data overturn a misconception,  
48 identify a new disease mechanism and suggest IL11 as a therapeutic target for liver regeneration.  
49

## 50 **Main text**

51 Acetaminophen (N-acetyl-p-aminophenol, APAP) is an over-the-counter analgesic that is  
52 commonly taken as an overdose (OD) leading to APAP-induced liver injury (AILI), a major  
53 cause of acute liver failure<sup>1</sup>. The antioxidant N-acetyl cysteine (NAC) is beneficial for patients  
54 presenting early<sup>2</sup>, but there is no drug-based treatment beyond eight hours post-OD and death  
55 can ensue if liver transplantation is not possible<sup>3,4</sup>.

56 In hepatocytes, APAP is metabolized to N-Acetyl-p-benzochinonimin (NAPQI) which  
57 depletes cellular glutathione (GSH) levels and damages mitochondrial proteins leading to  
58 reactive oxygen species (ROS) production and JNK activation<sup>5</sup>. ROS-related JNK activation  
59 results in a combination of necrotic, apoptotic and other forms of hepatocyte cell death causing  
60 liver failure<sup>1,6,7</sup>. JNK and ASK1 inhibitors have partial protective effects against AILI in mouse  
61 models, but this has not translated to the clinic<sup>8,9</sup>.

62 Liver regeneration has fascinated humans since the stories of Prometheus and can be  
63 truly profound, as seen after partial hepatic resection in rodents and humans<sup>10,11</sup>. However, in the  
64 setting of AILI, liver regeneration is persistently suppressed resulting in permanent injury and  
65 patient mortality. Targeting the pathways that hinder the liver's extraordinary regenerative  
66 capacity may trigger natural regeneration, which could be particularly useful in AILI<sup>12,13</sup>.

67 Interleukin 11 (IL11) is a scarcely studied cytokine that is of critical importance for  
68 myofibroblast activation and fibrosis of the heart, kidney, lung, and liver<sup>14-16</sup>. It is established  
69 that IL11 is secreted from injured hepatocytes and IL11 can be detected at high levels in the  
70 serum of the mouse model of AILI, where its expression is considered compensatory and  
71 cytoprotective<sup>17</sup>. In keeping with this paradigm, administration of recombinant human IL11  
72 (rhIL11) is effective in treating the mouse model of AILI and also protects against liver  
73 ischemia, endotoxemia or inflammation<sup>17-22</sup>. As recently as 2016, rhIL11 has been proposed as a  
74 treatment for patients with AILI<sup>23</sup>.

75 During our studies of liver fibrosis we made the unexpected observation that, in the  
76 context of some models of fibro-inflammatory liver disease, IL11 may be detrimental for  
77 hepatocyte function<sup>14</sup>. This apparent discrepancy with the previous literature prompted us to look  
78 in more detail at the effects of IL11 on hepatocytes independent of fibrosis and we chose to do so  
79 in the mouse model of AILI, where IL11 is largely upregulated<sup>17</sup>.

80

81 **IL11 drives APAP-induced hepatocyte cell death**

82 As reported previously<sup>17</sup>, we confirmed that AILI was characterized by elevated IL11 serum  
83 levels in injured mice (**Fig. 1A**). We then addressed whether the elevated IL11 serum levels in  
84 the mouse AILI model originated in the liver. APAP induced a strong upregulation of hepatic  
85 *Ill1* transcripts (35-fold,  $P < 0.0001$ ). Bioluminescent imaging of a reporter mouse with *luciferase*  
86 cloned into the start codon of *Ill1* indicated *IL11* expression throughout the liver (**Fig. 1B-C**,  
87 **Extended Data Fig. 1**). Western blotting confirmed IL11 upregulation at the protein level across  
88 a time course of AILI (**Fig. 1D**). Experiments using a second reporter mouse with an *EGFP*  
89 reporter construct inserted into the 3'UTR of *Ill1* (**Extended Data Fig. 2**) showed that following  
90 APAP, IL11 protein is highly expressed in necrotic centrilobular hepatocytes, the  
91 pathognomonic feature of AILI, coincident with cleaved caspase 3 (Cl. CASP3) (**Fig. 1E**).

92 Having identified the source of *Ill1* upregulation during AILI *in vivo*, we conducted *in*  
93 *vitro* experiments to study underlying mechanisms. Exposure of primary human hepatocytes to  
94 APAP resulted in the dose-dependent secretion of IL11 (**Fig. 1F**). Hepatocytes express  
95 interleukin 11 receptor subunit alpha (IL11RA) and it is known that IL11 activates ERK in some  
96 cell types<sup>14</sup>, hence we explored the effect of IL11 on ERK and JNK, important in AILI,  
97 activation in hepatocytes. IL11 induced late (>6h) and sustained ERK and JNK activation that  
98 was concurrent with CASP3 cleavage (**Fig. 1G**). FACS-based analyses showed dose-dependent  
99 IL11-induced hepatocyte cell death (**Fig. 1H, Extended Data Fig. 3A**). To explore the role of  
100 IL11 signaling in APAP-challenged hepatocytes, we used an IL11RA neutralizing antibody  
101 (X209)<sup>14</sup>, which inhibited CASP3 cleavage and cell death, as well as ERK and JNK activation  
102 (**Fig. 1I-J, Extended Data Fig. 3B**). While these data confirm the upregulation of IL11 in AILI,  
103 they challenge the common perception that this effect is compensatory and protective in the  
104 injured liver.

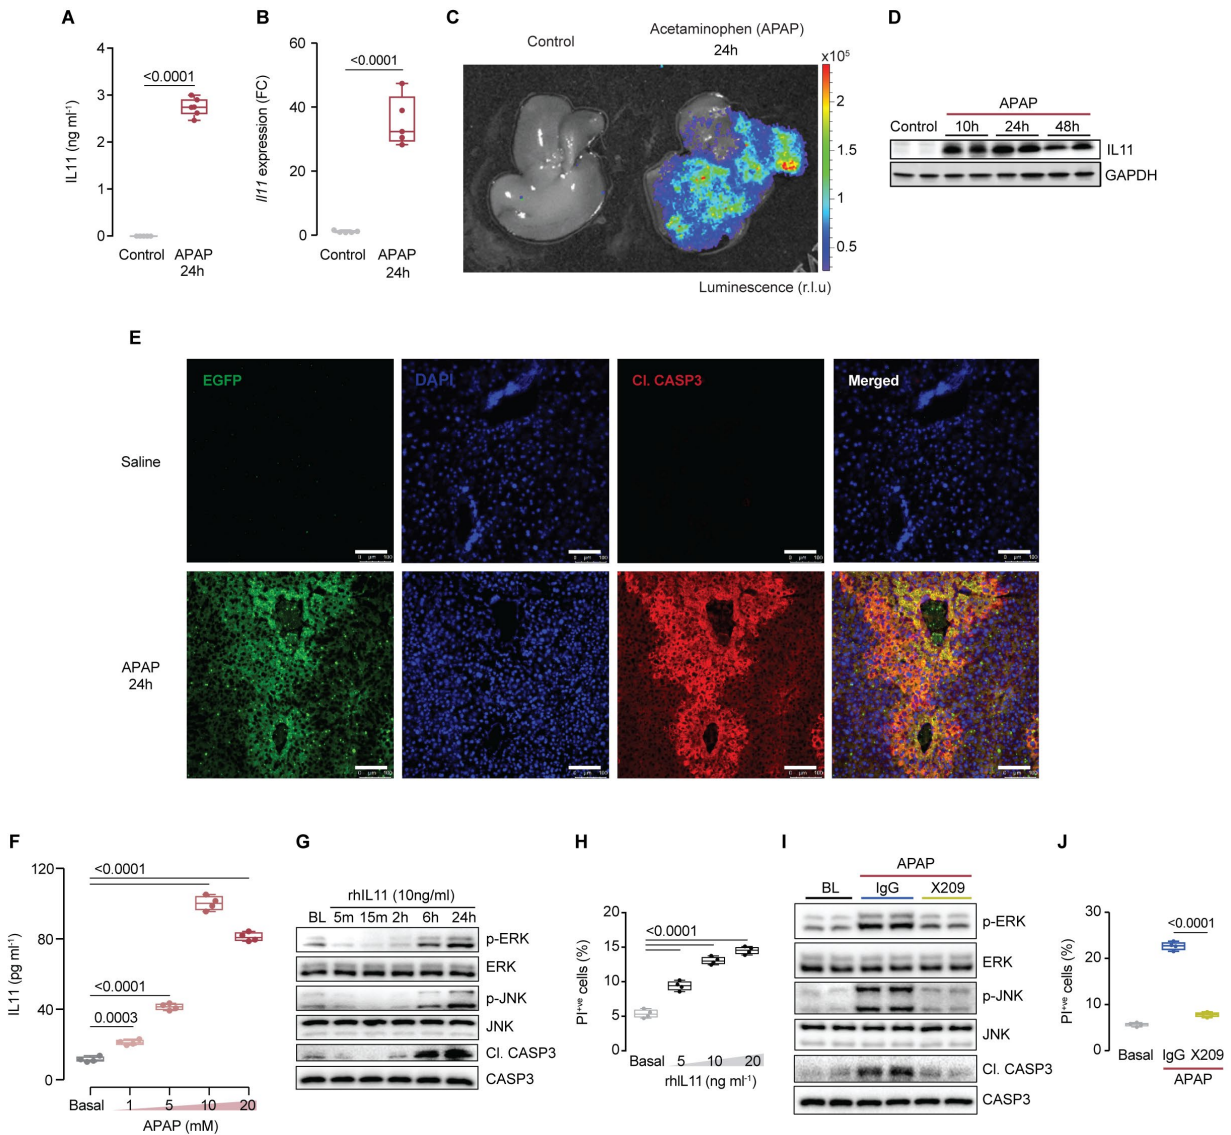

105  
106

**Figure 1: Acetaminophen-induced IL11 secretion from injured hepatocytes causes cell death.**

107  
108  
109 (A) Serum IL11 levels in APAP-treated mice. (B) Liver *I/II* mRNA following APAP injury. (C)  
110 Representative images of luciferase activity in a liver from control and APAP-challenged *I/II*-  
111 *Luciferase* mice. (D) Western blots showing hepatic IL11 expression in APAP-treated mice. (E)  
112 Representative immunofluorescence images (scale bars, 100  $\mu$ m) of EGFP and cleaved Caspase3  
113 (Cl. CASP3) expression in the livers of *I/II-EGFP* mice post APAP. (A-E) APAP, 400 mg kg<sup>-1</sup>.  
114 (F) ELISA of IL11 secretion from APAP-stimulated hepatocytes. (G) Western blots of  
115 phosphorylated ERK, JNK and Cl. CASP3 protein and their respective total expression in  
116 hepatocytes in response to rhIL11 stimulation. (H) Quantification of propidium iodide positive  
117 (PI<sup>+</sup>ve) cells from rhIL11-stimulated hepatocytes. (I) Western blots showing ERK, JNK, and  
118 CASP3 activation status and (J) quantification of PI<sup>+</sup>ve cells in APAP-treated hepatocytes (20  
119 mM) in the presence of IgG or anti-IL11RA (X209; 2  $\mu$ g ml<sup>-1</sup>). (F-J) primary human hepatocytes  
120 (F, H-J) 24h. (A, B, F, H-I) Data are shown as box-and-whisker with median (middle line),



121 25th–75th percentiles (box), and minimum-maximum values (whiskers). (A, B) Two-tailed  
122 Student's *t*-test; (F, H) two-tailed Dunnett's test; (J) two-tailed, Tukey-corrected Student's *t*-test.  
123

### 124 Species-specific effects of recombinant human IL11

125 rhIL11 is consistently reported to be protective in rodent models of liver damage<sup>17–20,23</sup>, yet our  
126 studies suggested rhIL11 has the exact opposite effect on human hepatocytes *in vitro* (Fig. 1).  
127 This prompted us to test for potential inconsistencies when rhIL11 protein is used in foreign  
128 species, as human and mouse IL11 share only 82% protein sequence homology. First, we  
129 compared the effects of rhIL11 versus recombinant mouse IL11 (rmIL11) on mouse hepatocytes.  
130 While the species-matched rmIL11 stimulated ERK and JNK phosphorylation and induced  
131 CASP3 cleavage in mouse hepatocytes, rhIL11 had no effect (Fig. 2A). Similarly, while rmIL11  
132 induced mouse hepatocyte cell death, rhIL11 did not. Indeed, at higher doses rhIL11 trended  
133 towards inhibiting mouse hepatocyte death (Fig. 2B). In reciprocal experiments in human  
134 hepatocytes, we found that rhIL11 stimulated ERK and JNK signaling and hepatocyte death,  
135 whereas rmIL11 did not (Extended Data Fig. 4A-B).

136 This showed that the role of IL11 signaling in hepatocyte death is conserved across  
137 species, but that recombinant IL11 protein has species-specific effects and does not activate the  
138 pathway in foreign species. We tested this hypothesis *in vivo* by injecting either rmIL11 or  
139 rhIL11 into mice (Fig. 2C). Injection of rmIL11 resulted in gradual ERK and immediate JNK  
140 activation. In contrast, rhIL11 had no effect on ERK or JNK phosphorylation (Fig. 2D). Injection  
141 of rmIL11 also caused liver damage with elevated ALT and AST (Fig. 2E, Extended Data Fig.  
142 4C). In stark contrast, rhIL11 injection in naive mice was associated with slightly lower ALT  
143 and AST levels 24h post-injection (ALT,  $P=0.018$ ; AST,  $P=0.0017$ ).

144 To follow up on the potential protective effect of rhIL11 in the mouse, we performed a  
145 protocol similar to the AILI study of 2001<sup>20</sup>, where rhIL11 was injected into the mouse after  
146 APAP OD (Fig. 2F). This confirmed that rhIL11 reduces the severity of AILI in mice (reduction:  
147 ALT, 52%,  $P=0.0001$ ; AST, 39%,  $P<0.0001$ ), whereas species-matched rmIL11 was not  
148 protective in the mouse (Fig. 2G, Extended Data Fig. 4D). The therapeutic effect of rhIL11 was  
149 accompanied by a reduction in hepatic ERK and JNK activation (Fig. 2H), which shows that  
150 rhIL11 blocks IL11-driven signaling pathways in the liver similar to IL11RA antibodies (Fig.  
151 1I).

152 Using surface plasmon resonance (SPR), we found that rhIL11 binds to mouse  
153 interleukin 11 receptor alpha chain 1 (mIL11RA1) with a  $K_D$  of 72 nM, which is slightly  
154 stronger than the rmIL11:mIL11RA1 interaction (94 nM) and close to that reported previously  
155 for rhIL11:hIL11RA (50 nM), which we reconfirmed (Fig. 2I, Extended Data Fig. 4E)<sup>24</sup>. We  
156 then performed a competition ELISA assay and found that rhIL11 competed with rmIL11 for  
157 binding to mIL11RA1 and was a very effective blocker as suggested by the higher affinity to  
158 mIL11RA1 (Fig. 2J). In mouse hepatocytes, rhIL11 was a potent, dose-dependent inhibitor of  
159 rmIL11-induced signaling pathways and cytotoxic activity (Fig. 2K-L, Extended Data Fig. 4F).  
160 Thus, paradoxically, foreign rhIL11 acts as a neutralizer of mouse IL11 both *in vitro* as *in vivo*  
161 and these observations challenge our understanding of the role of IL11 in liver injury and in  
162 disease more broadly.

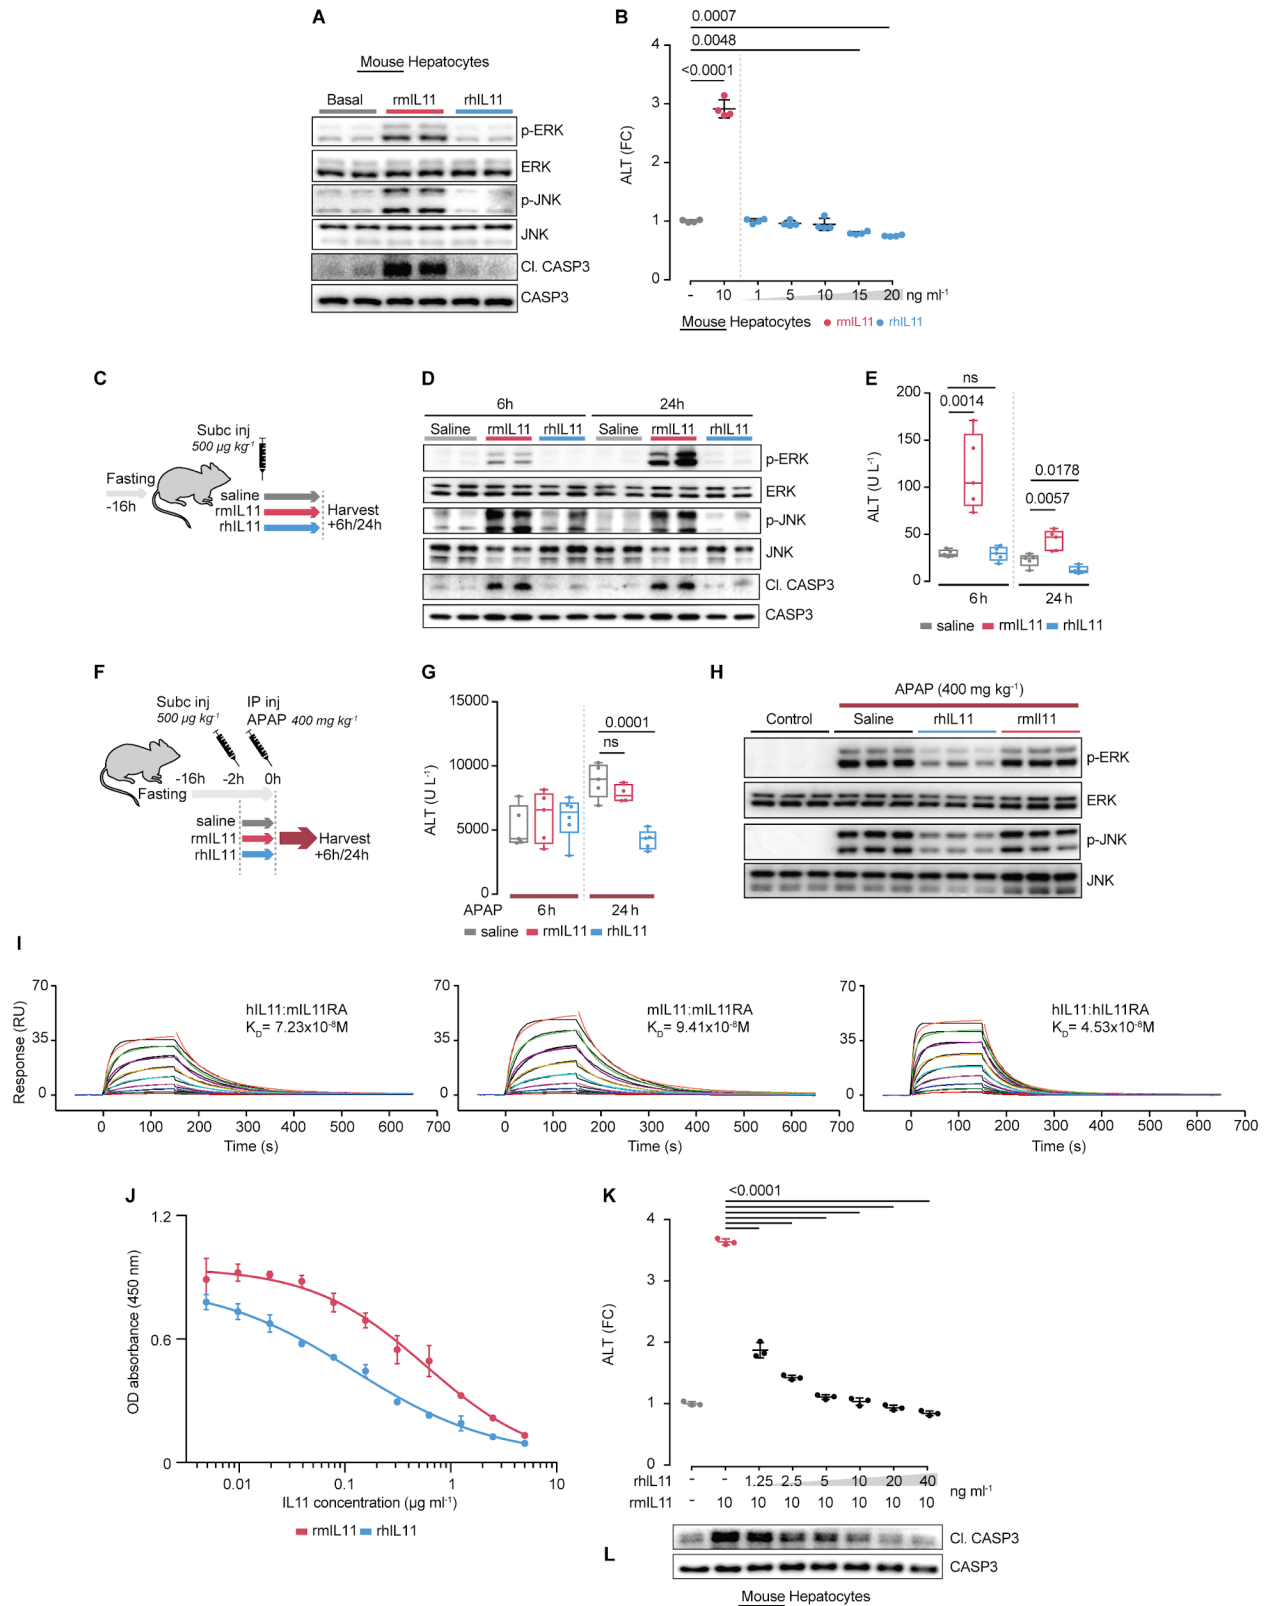

163  
164  
165

**Figure 2: Recombinant human IL11 inhibits mouse IL11 effects in mouse hepatocytes.**

166 (A) Effect of recombinant human IL11 (rhIL11, 10 ng ml<sup>-1</sup>) or recombinant mouse IL11  
167 (rmIL11, 10 ng ml<sup>-1</sup>) on ERK, JNK and CASP3 activation status in mouse hepatocytes. (B) ALT  
168 levels in mouse hepatocyte supernatant following stimulation by rmIL11 or by increasing doses  
169 of rhIL11. (C) Schematic of mice receiving a single subcutaneous injection of either saline,  
170 rhIL11, or rmIL11 (500 µg kg<sup>-1</sup>). (D) Western blot analysis of hepatic p-ERK, p-JNK, and Cl.  
171 CASP3 and (E) serum ALT levels of the experiments shown in **Fig. 2C**. (F) Schematic of mice  
172 receiving a subcutaneous injection of either saline, rhIL11, or rmIL11 2h prior to APAP OD.  
173 Effect of rhIL11 or rmIL11 injection prior to APAP OD on (G) serum ALT measurement at 6  
174 and 24h and on (H) hepatic ERK and JNK activation at 24h following APAP administration. (I)  
175 Sensorgrams showing binding of mIL11RA1 to immobilized rhIL11 (left) and rmIL11 (middle),  
176 and binding of hIL11RA to rhIL11 (right). The colored lines represent the experimental data; the  
177 black lines represent a theoretically fitted curve (1:1 Langmuir). (J) Binding of biotinylated  
178 rmIL11 to mIL11RA1 in the presence of two-fold dilutions of rmIL11 and rhIL11 by  
179 competition ELISA. Dose-dependent inhibition effect of rhIL11 on rmIL11-induced (K) ALT  
180 secretion and (L) CASP3 activation by mouse hepatocytes. (A, B, K, L) 24h. (B, K) Data are  
181 shown as mean±SD; (E, G) Data are shown as box-and-whisker with median (middle line),  
182 25th–75th percentiles (box), and minimum-maximum values (whiskers). (B, K) Two-tailed,  
183 Tukey-corrected Student's *t*-test; (E) two-tailed Student's *t*-test; (G) two-tailed Dunnett's test.  
184 FC: fold change

## 185 **Hepatocyte-specific expression of *Il11* causes spontaneous liver failure**

186 To test the effects of endogenous mouse IL11 secreted from hepatocytes *in vivo*, we expressed an  
187 *Il11* transgene specifically in hepatocytes by injecting *Rosa26<sup>Il11/+</sup>* mice<sup>15,16</sup> with AAV8 virus  
188 encoding an albumin promoter-driven Cre construct (*Il11*-Tg mice, **Fig. 3A**). Three weeks after  
189 transgene induction, *Il11*-Tg mice had grossly abnormal and smaller (38%,  $P < 0.0001$ ) livers with  
190 elevated serum ALT and AST levels, while other organs were unaffected (**Fig. 3B-D, Extended**  
191 **Data Fig. 5 A-B**). Histologically, there was marked portal vein dilatation and blood  
192 accumulation in the sinusoids - suggestive of a sinusoidal obstruction syndrome - as well as  
193 infiltrates around the portal triad (**Fig. 3E, Extended Data Fig. 5C**). Molecular analyses of *Il11*-  
194 Tg livers revealed activation of ERK, JNK, and CASP3 cleavage along with increased pro-  
195 inflammatory gene expression (**Fig. 3F, Extended Data Fig. 5D-E**). Thus secretion of IL11  
196 from hepatocytes, as seen with APAP toxicity (**Fig. 1**), is hepatotoxic.

## 197 **IL11 stimulates NOX4-mediated reactive oxygen species production**

198 IL11 signaling is required for APAP-driven JNK activation *in vitro* (**Fig. 1I-J**), which is known  
199 to follow ROS production and GSH depletion. We examined liver GSH levels in *Il11*-Tg mice  
200 and found they were diminished (62%,  $P < 0.0001$ ), indicating that IL11 signaling - directly or  
201 indirectly - induces ROS (**Fig. 3G**).

202  
203 In fibroblasts, the expression of *NOX4*, an NADPH oxidase, and source of ROS, is  
204 strongly associated with *Il11* expression<sup>15,25</sup>, and hepatocyte-specific *Nox4* deletion prevents  
205 pathological activation of JNK<sup>26</sup>. Therefore, we investigated the relationship between IL11,  
206 NOX4, and ROS in greater detail. In *Il11*-Tg mice, hepatic *Nox4* expression was upregulated  
207 (**Fig 3H**). In primary human hepatocytes, IL11 stimulated dose-dependent GSH depletion over a  
208 time course that mirrored ERK and JNK activation and was accompanied by NOX4 upregulation  
209 (**Fig. 1G, Fig. 3I-K**). As expected, only species-specific IL11 induced NOX4 upregulation and  
210 lowered GSH levels (**Fig. 3L, Extended Data Fig. 6A-D**).

211 APAP stimulation also resulted in NOX4 upregulation in hepatocytes, coincident with  
212 depletion in hepatocyte GSH levels, which was blocked with the anti-IL11RA antibody X209  
213 (**Fig. 3 M-N**). We reconsidered the effect of rhIL11 in inhibiting endogenous IL11-induced cell  
214 death in mouse hepatocytes (**Fig. 2J-K**) and found clear, dose-dependent effects of rhIL11 in  
215 restoring GSH levels in rmIL11 stimulated mouse cells (**Extended Data Fig. 7A**). Similarly,  
216 rhIL11 restored APAP-induced GSH depletion in the mice, while rmIL11 did not (**Extended**  
217 **Data Fig. 7B**). GKT-13781, a specific NOX4 inhibitor, prevented IL11-stimulated GSH  
218 depletion, CASP3 activation and cell death in a dose-dependent manner (**Fig. 3O, Extended**  
219 **Data Fig. 8A-B**). The specificity of pharmacological inhibition of NOX4 was confirmed using  
220 siRNA, which prevented IL11-induced hepatotoxicity (**Fig. 3P-Q, Extended Data Fig. 9A-B**).  
221 Together these data show that IL11-stimulated NOX4 activity, which could also impact  
222 mitochondrial ROS, is important for GSH depletion in the context of AILI.

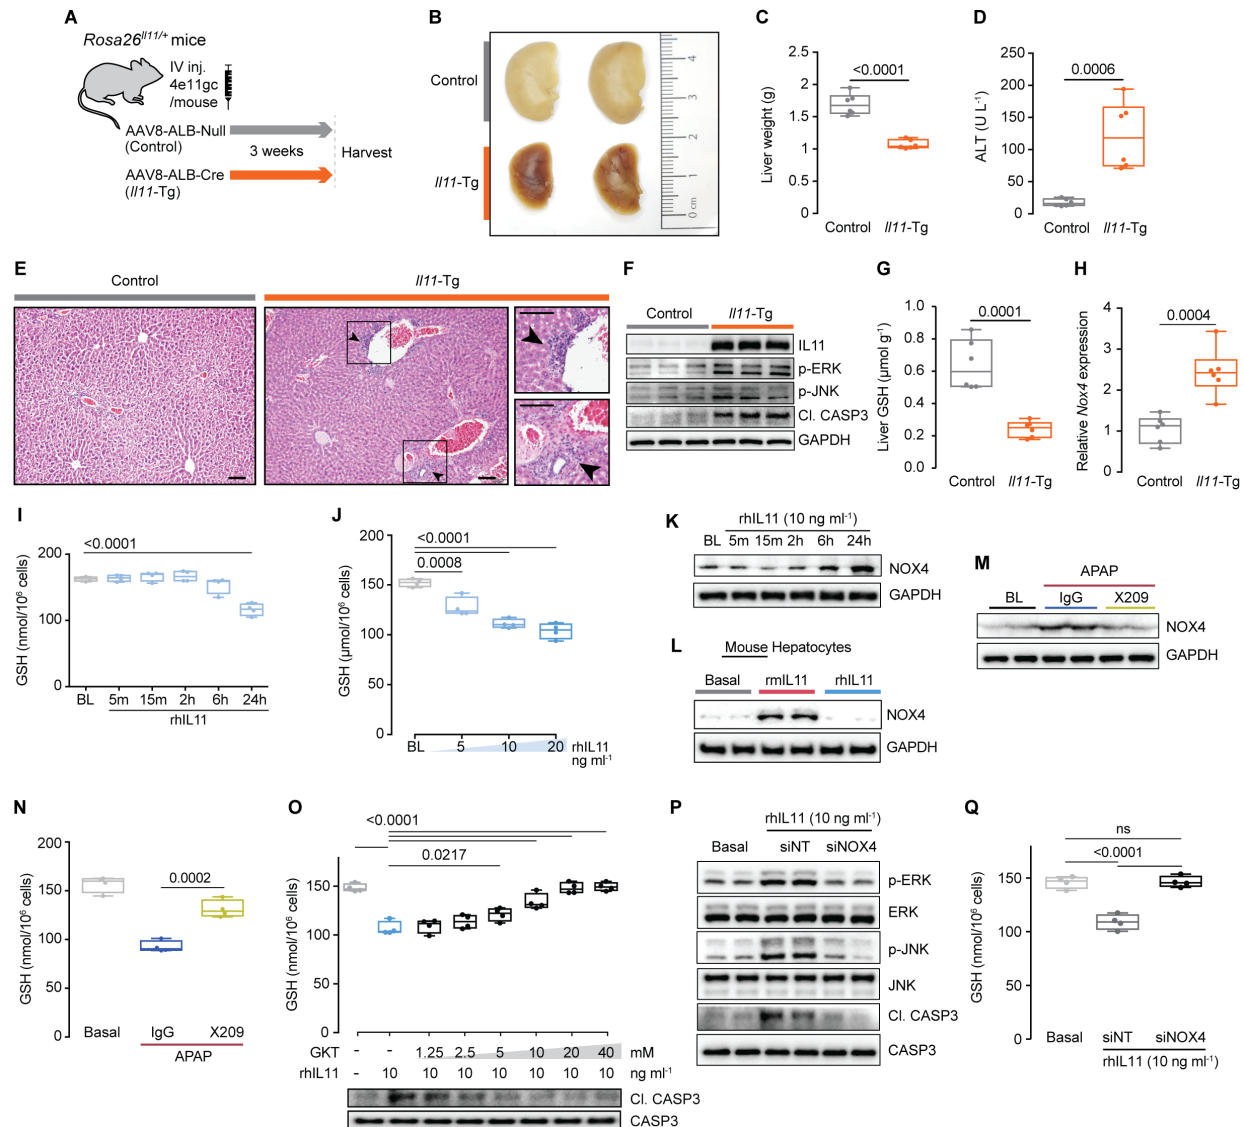

223  
224

**Figure 3: IL11 causes liver failure through NOX4-dependent glutathione depletion.**  
 (A) Schematic of *Rosa26<sup>Il11/+</sup>* mice receiving a single intravenous injection of either AAV8-  
 ALB-Null (control) or AAV8-ALB-Cre (*Il11-Tg*) to specifically induce *Il11* overexpression in  
 albumin-expressing cells (hepatocytes); ALB: ALBUMIN. (B) Representative gross anatomy of  
 livers, (C) liver weights, (D) serum ALT levels, (E) representative H&E-stained liver images  
 (scale bars, 100  $\mu$ m), (F) western blotting of p-ERK, p-JNK, and Cl. CASP3, (G) liver GSH  
 levels, and (H) *Nox4* mRNA expression levels in control and *Il11-Tg* mice 3 weeks after  
 injection. (I) Time course GSH levels, (J) dose-dependent decrease in GSH levels, and (K)  
 western blots showing increased NOX4 protein expression in rhIL11-treated primary human  
 hepatocytes. (L) Western blots of NOX4 in rhIL11 or rmIL11-stimulated mouse hepatocytes.  
 (M) Western blots of NOX4 expression and (N) GSH levels in IgG and X209-treated APAP-  
 stimulated human hepatocytes (20 mM). (O) Dose-dependent inhibition effect of GKT-13781 on  
 GSH levels and CASP3 activation in rhIL11-stimulated human hepatocytes. Effect of siNOX4  
 on rhIL11-induced (P) ERK, JNK, and CASP3 activation and (Q) GSH depletion levels in  
 human hepatocytes. (I-Q) rhIL11/rmIL11 (10 ng ml<sup>-1</sup>, unless otherwise specified), APAP (20



240 mM), IgG/X209 (2  $\mu\text{g ml}^{-1}$ ), siNT (non-targeting siRNA control)/siNOX4 (50 nM). (I-K, M-Q)  
241 primary human hepatocytes, (L) primary mouse hepatocytes. (J, L-Q) 24h. (C-D, G-J, N, O, Q)  
242 Data are shown as box-and-whisker with median (middle line), 25th–75th percentiles (box), and  
243 minimum-maximum values (whiskers). (C-D, G-H) Two-tailed Student's *t*-test; (I-J) two-tailed  
244 Dunnett's test; (N, O, Q) two-tailed, Tukey-corrected Student's *t*-test.

245

#### 246 **Hepatocyte-specific deletion of *Il11ral* prevents APAP-induced liver failure**

247 To delete *Il11ral* specifically in adult mouse hepatocytes we created *Il11ral* conditional  
248 knockouts (CKOs) by injecting AAV8-ALB-Cre virus to mice homozygous for LoxP-flanked  
249 *Il11ral* alleles, along with wildtype controls. Three weeks after viral infection, control mice and  
250 CKOs were administered APAP (400 mg  $\text{kg}^{-1}$ ) (Fig. 4A). The day after APAP administration,  
251 gross anatomy revealed small and discolored livers in control mice, whereas livers from CKO  
252 mice looked normal (Fig. 4B). Histology showed typical and extensive centrilobular necrosis in  
253 control mice, which was not observed in CKOs (Fig. 4C).

254 It was striking that CKO mice had 99% and 95% lower ALT and AST levels,  
255 respectively, as compared to controls and GSH levels that were similar to baseline. Both groups  
256 had similar levels of APAP and APAP-Glutathione (APAP metabolite) in the serum and thus  
257 *Il11ral* deletion does not impact APAP metabolism (Fig. 4D-F, Extended Data Fig. 10A-B).  
258 ERK and JNK activation was observed in control mice, but not in the CKOs (Fig. 4G). Deletion  
259 of the receptor in hepatocytes also significantly reduced inflammatory markers, suggesting that  
260 inflammation in AILI is secondary to parenchymal injury. (Fig 4H). Taken together, these data  
261 show a dominant role for hepatocyte-specific IL11 signaling in the pathogenesis of AILI. The  
262 fact that *Il11ral* deletion in hepatocytes is sufficient to protect from APAP OD indicates that  
263 free soluble IL11RA1 in the serum or receptor shedding from other cellular sources does not  
264 contribute to disease pathogenesis via *trans*-signaling.

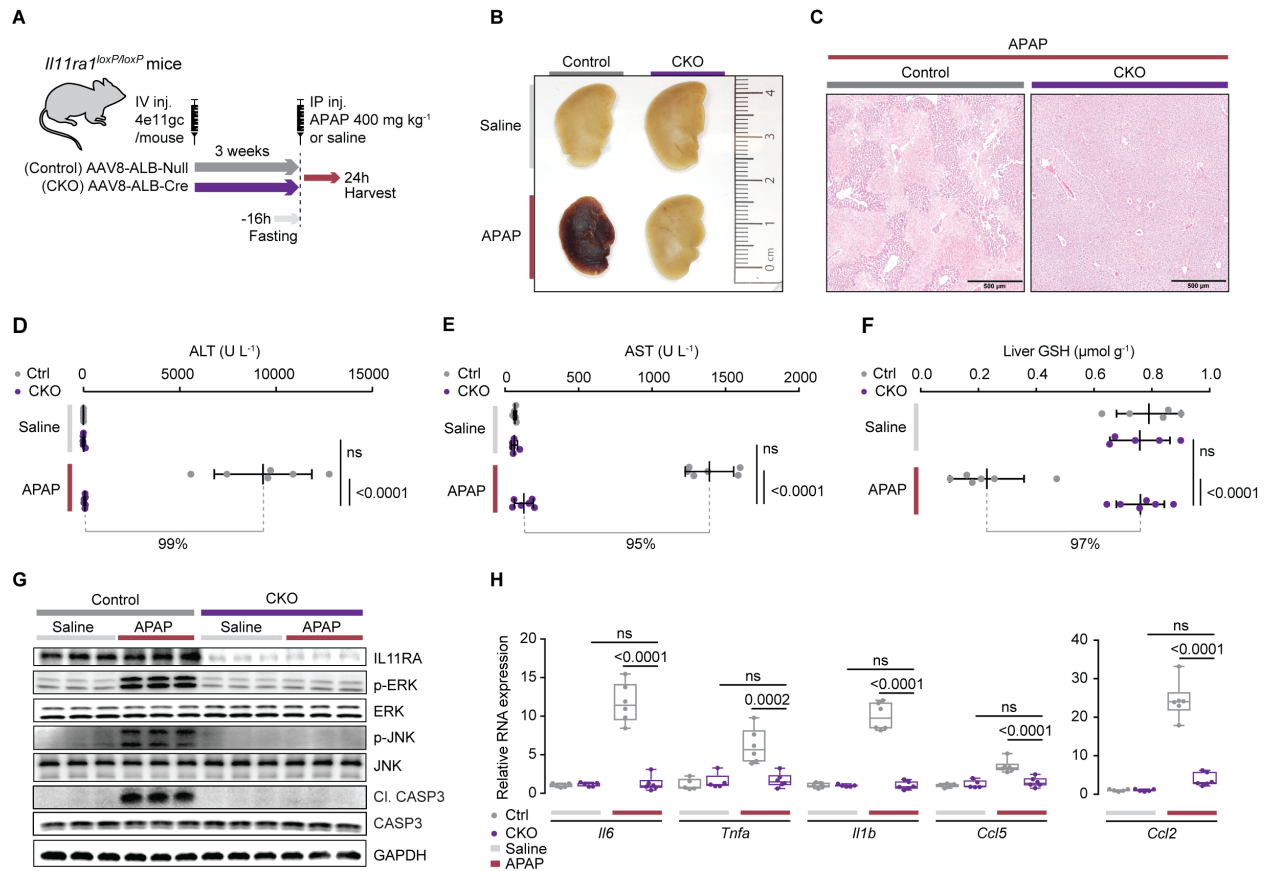

265

266 **Figure 4: Hepatocyte-specific *Il11ra1* deletion protects mice from APAP-induced liver**  
 267 **damage.**

268 (A) Schematic of induction of APAP injury in *Il11ra1<sup>loxP/loxP</sup>* mice. *Il11ra1<sup>loxP/loxP</sup>* mice were  
 269 intravenously injected with either AAV8-ALB-Null (control) or AAV8-ALB-Cre (CKO) to  
 270 specifically delete *Il11ra1* in hepatocytes. Overnight-fasted control and CKO mice were injected  
 271 with APAP (400 mg kg<sup>-1</sup>) or saline, 3 weeks following virus administration. ALB: Albumin. (B)  
 272 Representative liver gross anatomy and (C) H&E images (scale bars, 500 μm) from saline and  
 273 APAP-injected control and CKO mice. (D) Serum ALT levels, (E) serum AST levels, (F) liver  
 274 GSH levels, (G) western blots of IL11RA, p-ERK, ERK, p-JNK, JNK, Cl. CASP3, CASP3 and  
 275 GAPDH, and (H) relative liver mRNA expression levels of proinflammatory genes. (D-F, H)  
 276 Data are shown as box-and-whisker with median (middle line), 25th–75th percentiles (box), and  
 277 minimum-maximum values (whiskers); Sidak-corrected Student's *t*-test.

278 **Effects of anti-IL11RA administration early during APAP-induced liver injury**

279 We next tested if therapeutic inhibition of IL11 signaling was effective in mitigating AILI by  
280 administering anti-IL11RA (X209) antibody<sup>14</sup>. Initially, we performed a preventive treatment by  
281 injecting X209 or control antibody (10 mg kg<sup>-1</sup>) 16h prior to APAP. This approach reduced  
282 serum markers of liver damage by over 70%, largely restored hepatic GSH levels, and limited  
283 histological evidence of centrilobular necrosis (**Fig. 5A-D, Extended Data Fig. 11A**).

284 Next, we administered anti-IL11RA therapy in a therapeutically-relevant mode by giving  
285 antibody 3h after APAP, a time point by which APAP metabolism and toxicity is established and  
286 after which most interventions have no effect in the mouse model of AILI (**Fig. 5E**)<sup>9</sup>. X209,  
287 across a range of doses (2.5-10 mg kg<sup>-1</sup>), inhibited AILI with dose-dependent improvements in  
288 markers of liver damage and in hepatic GSH levels. Reduced JNK and ERK activation  
289 confirmed dose-dependent target coverage (**Fig. 5F-H, Extended Data Fig. 11B**).

290 Lastly, we determined whether inhibiting IL11 signaling had added value when given in  
291 combination with the current standard of care, NAC, 3h after APAP dosing (**Fig. 5I**).  
292 Administration of NAC alone reduced serum levels of ALT and AST. However, NAC in  
293 combination with X209 was even more effective than either NAC or X209 alone (ALT  
294 reduction: NAC, 38%, P=0.0007; X209, 47%, P<0.0001; NAC+X209, 75%; P<0.0001) (**Fig. 5F,**  
295 **J, Extended Data Fig. 11C**). At the molecular level, the degree of ERK and JNK inhibition with  
296 NAC or NAC together with X209 mirrored the magnitude of ALT reduction in the serum and the  
297 restoration of hepatic GSH levels (**Fig. 5K-L**). As such, anti-IL11RA therapy has added benefits  
298 when given in combination with the current standard of care.

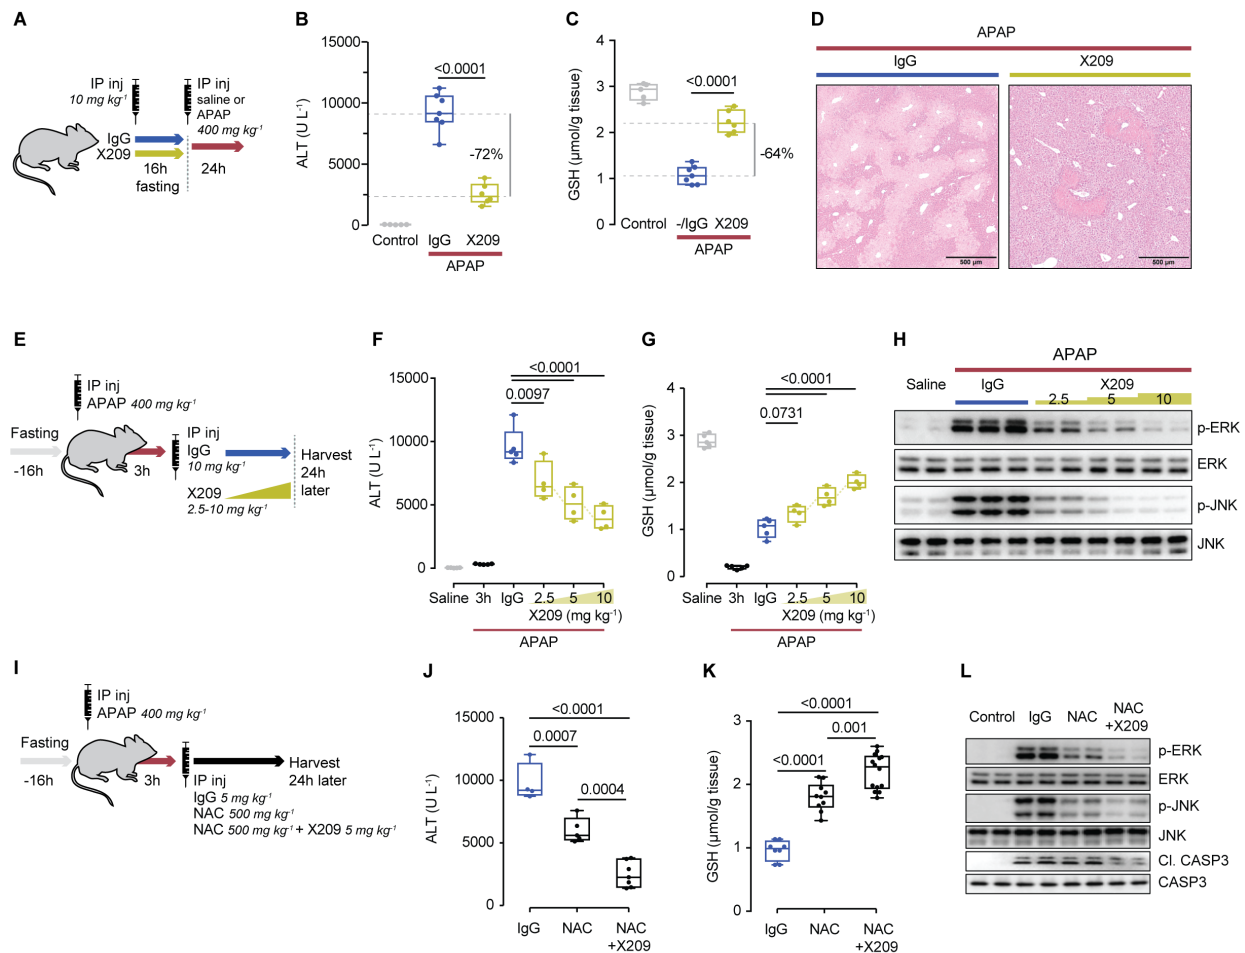

299

300 **Figure 5: Treatment of APAP-induced liver damage with anti-IL11RA antibody and/or**  
 301 **NAC.**

302 **(A)** Schematic of anti-IL11RA (X209) preventive dosing in APAP OD mice; X209 or IgG (10  
 303 mg kg<sup>-1</sup>) was administered at the beginning of fasting period, 16h prior to APAP (400 mg kg<sup>-1</sup>)  
 304 injection; control mice received saline injection. **(B)** Serum ALT levels, **(C)** representative H&E  
 305 images (scale bars, 500 μm), and hepatic GSH levels for the experiments shown in Fig. 5A. **(E)**  
 306 Schematic of anti-IL11RA (X209) dose finding experiments; X209 (2.5-10 mg kg<sup>-1</sup>) or IgG  
 307 (10mg kg<sup>-1</sup>) was administered to mice 3h following APAP injection. **(F)** Serum ALT levels (the  
 308 values of saline are the same as those used in 5B), **(G)** hepatic GSH levels, and **(H)** Western  
 309 blots of hepatic ERK and JNK activation from experiments shown in Fig. 5E. **(I)** Schematic  
 310 showing therapeutic comparison of X209 and N-acetyl-cysteine (NAC, 500 mg kg<sup>-1</sup>) alone or in  
 311 combination with X209 (5 mg kg<sup>-1</sup>). Overnight-fasted mice were treated with IgG, NAC, or  
 312 NAC+X209 3h post APAP injection for data shown in **(J-L)**. Effect of NAC, NAC+X209  
 313 treatment on **(H)** serum ALT levels, on **(I)** hepatic GSH levels, and on **(J)** p-ERK, p-JNK, and  
 314 Cl. CASP3 expression levels **(B, C, F, G, J, K)** Data are shown as box-and-whisker with  
 315 median (middle line), 25th–75th percentiles (box), and minimum-maximum values (whiskers); two-  
 316 tailed, Tukey-corrected Student's *t*-test.

317 **Liver regeneration with anti-IL11RA therapy**

318 For patients presenting to the emergency room 8h or later after APAP OD there is no effective  
319 treatment. This prompted us to test anti-IL11RA 10h after APAP (400 mg kg<sup>-1</sup>) administration to  
320 mice (**Fig. 6A**). Given the accelerated metabolism of APAP in the mouse, therapy at 10h in this  
321 model is equivalent to the treatment of a human up to 24h post-APAP OD. We quantified APAP  
322 and APAP-Glutathione in serum by mass spectrometry and found levels to be elevated compared  
323 to saline-treated controls and equivalent between experimental groups, as expected (**Extended**  
324 **Data Fig. 12A-B**). Analysis of gross anatomy, histology and serum IL11, ALT and AST levels  
325 revealed that X209 largely reversed liver damage by the second day after APAP, whereas IgG  
326 treated mice had profound and sustained liver injury (**Fig. 6B-E, Extended Data Fig. 13A**). The  
327 therapeutic antibody effectively blocked ERK and JNK activation throughout the course of the  
328 experiment and this preceded a reduction in cleaved CASP3 at 24h (**Fig. 6F, Extended Data**  
329 **Fig. 13B**).

330 Interventions promoting liver regeneration, which has very large potential, may provide a  
331 new means of treating AILI<sup>12</sup>. We therefore assessed the status of genes important for liver  
332 regeneration<sup>10</sup>. Inhibition of IL11 signaling was associated with a robust signature of  
333 regeneration with strong upregulation of PCNA, Cyclin D1/D3/E1, and phosphorylation of RB,  
334 as seen during regeneration following partial hepatectomy<sup>10</sup>. EdU injection and histological  
335 analyses showed very large numbers of nuclei with evidence of recent DNA synthesis in X209-  
336 treated mice as compared to controls (**Fig. 6G**). We reassessed the effects X209 given 3h post-  
337 APAP (**Fig. 5I-L**) to see if regeneration was also associated with inhibition of IL11 signaling at  
338 earlier time points. This proved to be the case, and the combination of X209 and NAC was more  
339 effective than NAC alone in increasing molecular markers of regeneration, notably for Cyclin D1  
340 and D3 (**Fig. 6H**).

341 Finally, we administered X209 (20 mg kg<sup>-1</sup>) 10h after a higher and lethal acetaminophen  
342 dose (550 mg kg<sup>-1</sup>) at a time point when mice were moribund and livers undergoing fulminant  
343 necroinflammation (**Fig. 6I**). X209-treated mice recovered and had a 90% survival by the study  
344 end. In contrast, IgG-treated mice did not recover and succumbed with a 100% mortality within  
345 48h, (**Fig. 6J**). On day 8 after the lethal dose of APAP, X209-treated mice appeared healthy with  
346 normal liver morphology and ALT levels were comparable to controls that had not received  
347 APAP (**Fig. 6K, Extended Data Fig. 14A-B**).

348



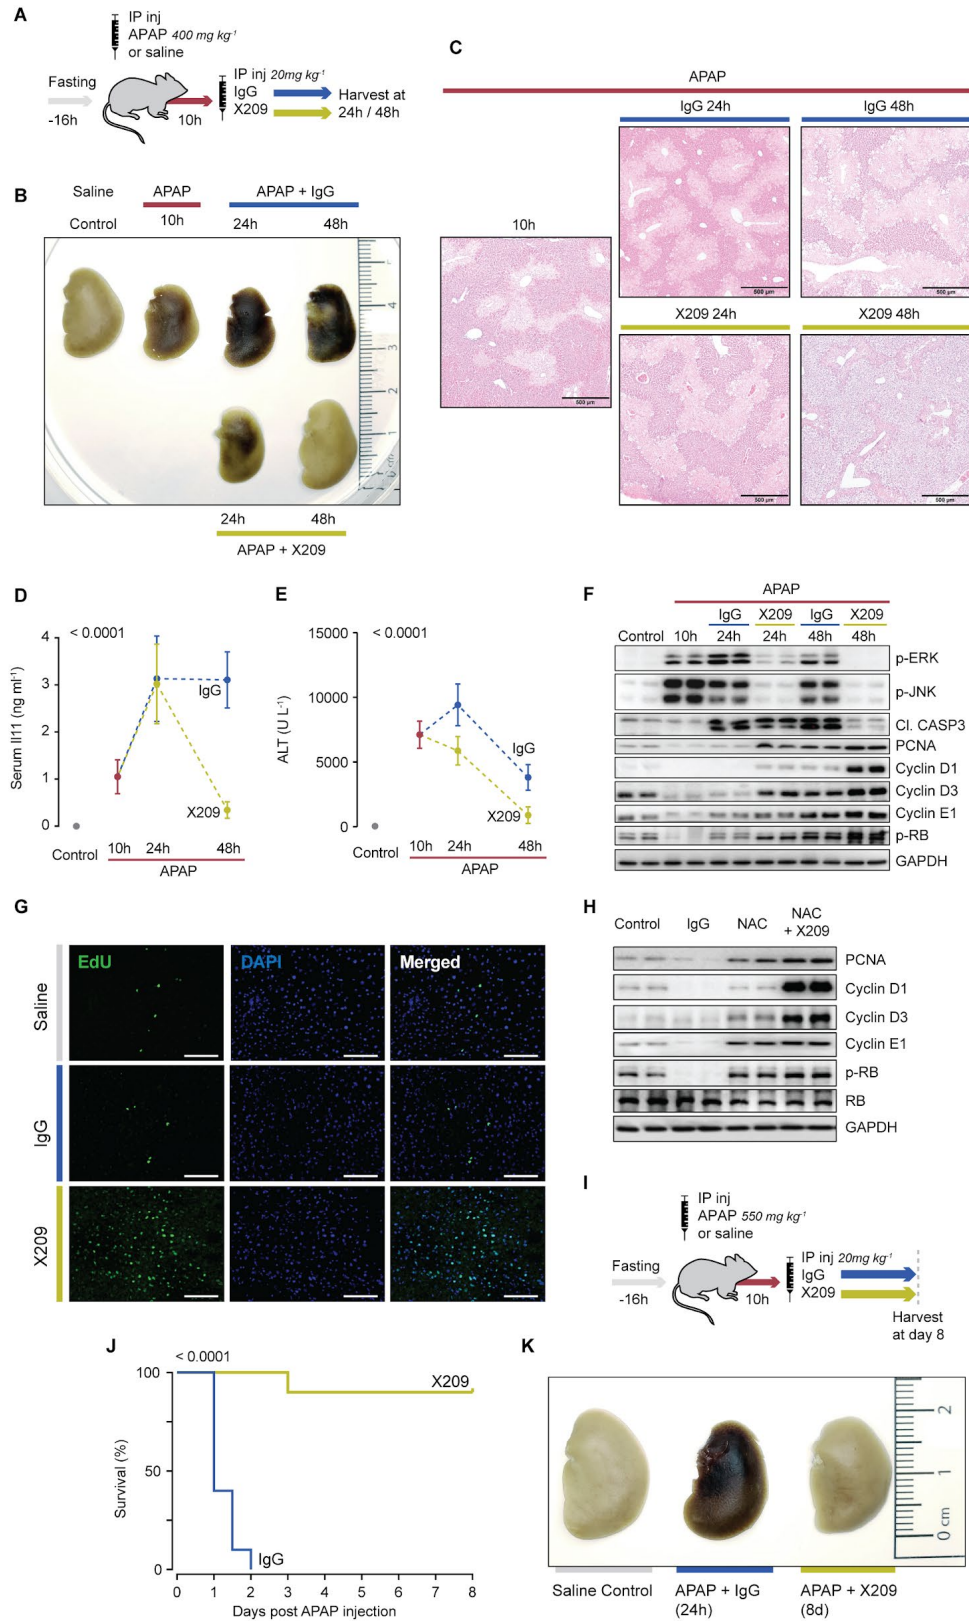

350 **Figure 6: Hepatic regeneration and reversal of liver failure with late anti-IL11RA therapy.**  
351 (A) Schematic showing late therapeutic dosing of APAP-injured mice. Overnight fasted mice  
352 were administered IgG/X209 (20 mg kg<sup>-1</sup>) 10h post-APAP. (B) Representative liver gross  
353 anatomy, (C) representative H&E-stained liver images (scale bars, 500 μm), (D) serum Il11  
354 levels, (E) serum ALT levels, (F) western blots of p-ERK, p-JNK, Cl. CASP3, PCNA, Cyclin  
355 D1/D3/E1, and p-RB, (G) representative EdU-stained liver images (scale bars, 100 μm) from  
356 APAP mice receiving a late X209 dose (10h post APAP) as shown in Fig. 6A. (H) Western blots  
357 showing PCNA, Cyclin D1/D3/E1, p-RB protein expression levels in livers from APAP mice  
358 treated with either NAC or NAC+X209 (Schematic Fig. 5G). (I) Schematic of mice receiving  
359 X209 (20mg kg<sup>-1</sup>) treatment 10h following a lethal APAP OD (550 mg kg<sup>-1</sup>) for data shown in  
360 (J-K). (J) Survival curves of mice treated with either IgG or X209 10h post lethal APAP OD.  
361 (K) Gross liver anatomy of control (D8), IgG (24h) and X209-treated mice (D8).  
362 (D, E) Data are mean±SD; 2-way ANOVA; (J) Gehan-Breslow-Wilcoxon test.  
363

## 364 Discussion

365 APAP OD is common with up to 50,000 individuals attending emergency departments every  
366 year in the UK, some who develop liver failure requiring transplantation<sup>1</sup>. Here, we describe the  
367 unexpected discovery that IL11, previously reported as protective against APAP-induced liver  
368 failure<sup>17,20</sup>, liver ischemia<sup>18,21</sup>, endotoxemia<sup>22</sup> and inflammation<sup>19</sup>, is actually hepatotoxic and of  
369 central importance for liver failure following APAP OD.

370 The observation that endogenous IL11 is hepatotoxic is most surprising as over 30  
371 publications have reported cytoprotective and/or anti-inflammatory effects of rhIL11 in rodent  
372 models of human disease (**Supplementary Table 1,2**). We discovered that rhIL11 is a  
373 competitive inhibitor of mouse IL11 binding to IL11RA1, which overturns our understanding of  
374 the role of IL11 in AILI and liver disease more generally. This also implies that anti-IL11  
375 therapies may be effective in additional diseases where rhIL11 had protective effects in mouse  
376 models such as rheumatoid arthritis<sup>27</sup> and colitis<sup>28</sup>, among others (**Supplementary Table 2**). We  
377 highlight that, based on the erroneous assumption that rhIL11 effects in mice embodied  
378 beneficial IL11 gain-of-function, a number of clinical trials using rhIL11 were performed in  
379 patients (**Supplementary Table 3**).

380 Our study stimulates questions and has limitations. We show ERK is co-regulated with  
381 JNK post-APAP, yet ERK's specific role in AILI is not known. Likewise, although hepatocyte-  
382 specific *Nox4* deletion is protective<sup>26</sup>, mice with global *Nox4* deletion are susceptible to AILI<sup>29</sup>.  
383 IL11 is critical for myofibroblasts<sup>14-16</sup>, which are also dependent on NOX4<sup>30,31</sup>. In the current  
384 study, we show reduced hepatic JNK activation following IL11 inhibition, which is similar to  
385 that seen in livers of mice with hepatocyte-specific *Nox4* deletion and steatohepatitis, further  
386 suggestive of an IL11-NOX4 relationship<sup>14,26</sup>. Whether anti-IL11 therapy stimulates regeneration  
387 in other organs is not known. These matters require further study.

388 We propose a refined mechanism for APAP toxicity whereby NAPQI damaged  
389 mitochondria produce ROS that stimulates IL11-dependent NOX4 upregulation and further  
390 sustained ROS production (**Extended Data Fig. 15**). This drives a dual pathology: killing  
391 hepatocytes via JNK and caspase activation and preventing hepatocyte regeneration, through  
392 mechanisms yet to be defined. The mouse model of AILI closely resembles human disease and  
393 we suggest that therapies targeting IL11 signaling might be trialed in patients with APAP-  
394 induced liver toxicity. Since IL11 neutralizing therapies are not dependent on altering APAP  
395 metabolism and specifically stimulate regeneration, they are effective much later than the current  
396 standard of care and might be particularly useful for patients presenting late to the emergency

397 room.

398

399

400 **References and notes**

- 401 1. Bernal, W. & Wendon, J. Acute liver failure. *The New England journal of medicine* **370**,
- 402 1170–1171 (2014).
- 403 2. Lee, W. M. *et al.* Intravenous N-acetylcysteine improves transplant-free survival in early
- 404 stage non-acetaminophen acute liver failure. *Gastroenterology* **137**, 856–64, 864.e1 (2009).
- 405 3. Jaeschke, H. Acetaminophen: Dose-Dependent Drug Hepatotoxicity and Acute Liver Failure
- 406 in Patients. *Dig. Dis.* **33**, 464–471 (2015).
- 407 4. Chiew, A. L., Gluud, C., Brok, J. & Buckley, N. A. Interventions for paracetamol
- 408 (acetaminophen) overdose. *Cochrane Database Syst. Rev.* **2**, CD003328 (2018).
- 409 5. Win, S. *et al.* New insights into the role and mechanism of c-Jun-N-terminal kinase signaling
- 410 in the pathobiology of liver diseases. *Hepatology* **67**, 2013–2024 (2018).
- 411 6. Zhang, H. *et al.* Reduction of liver Fas expression by an antisense oligonucleotide protects
- 412 mice from fulminant hepatitis. *Nat. Biotechnol.* **18**, 862–867 (2000).
- 413 7. Schwabe, R. F. & Luedde, T. Apoptosis and necroptosis in the liver: a matter of life and
- 414 death. *Nat. Rev. Gastroenterol. Hepatol.* **15**, 738–752 (2018).
- 415 8. Gunawan, B. K. *et al.* c-Jun N-Terminal Kinase Plays a Major Role in Murine
- 416 Acetaminophen Hepatotoxicity. *Gastroenterology* **131**, 165–178 (2006).
- 417 9. Xie, Y. *et al.* Inhibitor of apoptosis signal-regulating kinase 1 protects against
- 418 acetaminophen-induced liver injury. *Toxicol. Appl. Pharmacol.* **286**, 1–9 (2015).
- 419 10. Sekiya, S. & Suzuki, A. Glycogen synthase kinase 3  $\beta$ -dependent Snail degradation directs
- 420 hepatocyte proliferation in normal liver regeneration. *Proc. Natl. Acad. Sci. U. S. A.* **108**,
- 421 11175–11180 (2011).
- 422 11. Marcos, A. *et al.* Liver regeneration and function in donor and recipient after right lobe adult
- 423 to adult living donor liver transplantation. *Transplantation* **69**, 1375–1379 (2000).
- 424 12. Bhushan, B. & Apte, U. Liver Regeneration after Acetaminophen Hepatotoxicity:
- 425 Mechanisms and Therapeutic Opportunities. *Am. J. Pathol.* **189**, 719–729 (2019).
- 426 13. Michalopoulos, G. K. Hepatostat: Liver regeneration and normal liver tissue maintenance.
- 427 *Hepatology* **65**, 1384–1392 (2017).
- 428 14. Widjaja, A. A. *et al.* Inhibiting Interleukin 11 Signaling Reduces Hepatocyte Death and
- 429 Liver Fibrosis, Inflammation, and Steatosis in Mouse Models of Non-Alcoholic
- 430 Steatohepatitis. *Gastroenterology* (2019). doi:10.1053/j.gastro.2019.05.002
- 431 15. Schafer, S. *et al.* IL-11 is a crucial determinant of cardiovascular fibrosis. *Nature* **552**, 110–
- 432 115 (2017).
- 433 16. Cook, S. *et al.* IL-11 is a therapeutic target in idiopathic pulmonary fibrosis. (2018).
- 434 doi:10.1101/336537
- 435 17. Nishina, T. *et al.* Interleukin-11 links oxidative stress and compensatory proliferation. *Sci.*
- 436 *Signal.* **5**, ra5 (2012).
- 437 18. Zhu, M. *et al.* IL-11 Attenuates Liver Ischemia/Reperfusion Injury (IRI) through STAT3
- 438 Signaling Pathway in Mice. *PLoS One* **10**, e0126296 (2015).
- 439 19. Bozza, M. *et al.* Interleukin-11 reduces T-cell-dependent experimental liver injury in mice.
- 440 *Hepatology* **30**, 1441–1447 (1999).
- 441 20. Trepicchio, W. L., Bozza, M., Bouchard, P. & Dorner, A. J. Protective effect of rhIL-11 in a
- 442 murine model of acetaminophen-induced hepatotoxicity. *Toxicol. Pathol.* **29**, 242–249

- 443 (2001).  
444 21. Yu, J., Feng, Z., Tan, L., Pu, L. & Kong, L. Interleukin-11 protects mouse liver from warm  
445 ischemia/reperfusion (WI/Rp) injury. *Clin. Res. Hepatol. Gastroenterol.* **40**, 562–570 (2016).  
446 22. Maeshima, K. *et al.* A protective role of interleukin 11 on hepatic injury in acute  
447 endotoxemia. *Shock* **21**, 134–138 (2004).  
448 23. Mühl, H. STAT3, a key parameter of cytokine-driven tissue protection during sterile  
449 inflammation--the case of experimental acetaminophen (Paracetamol)-induced liver damage.  
450 *Front. Immunol.* **7**, 163 (2016).  
451 24. Schleinkofer, K. *et al.* Identification of the Domain in the Human Interleukin-11 Receptor that  
452 Mediates Ligand Binding. *available online at <http://www.idealibrary.com> on J. Mol. Biol.*  
453 **306**, 263–274 (2001).  
454 25. Denton, C. P. *et al.* Therapeutic interleukin-6 blockade reverses transforming growth factor-  
455 beta pathway activation in dermal fibroblasts: insights from the fascinate clinical trial in  
456 systemic sclerosis. *Ann. Rheum. Dis.* **77**, 1362–1371 (2018).  
457 26. Bettaieb, A. *et al.* Hepatocyte Nicotinamide Adenine Dinucleotide Phosphate Reduced  
458 Oxidase 4 Regulates Stress Signaling, Fibrosis, and Insulin Sensitivity During Development  
459 of Steatohepatitis in Mice. *Gastroenterology* **149**, 468–80.e10 (2015).  
460 27. Walmsley, M., Butler, D. M., Marinova-Mutafchieva, L. & Feldmann, M. An anti-  
461 inflammatory role for interleukin-11 in established murine collagen-induced arthritis.  
462 *Immunology* **95**, 31–37 (1998).  
463 28. Qiu, B. S., Pfeiffer, C. J. & Keith, J. C. Protection by recombinant human interleukin-11  
464 against experimental TNB-induced colitis in rats. *Digestive Diseases and Sciences* **41**, 1625–  
465 1630 (1996).  
466 29. Murray, T. V. A. *et al.* NADPH oxidase 4 regulates homocysteine metabolism and protects  
467 against acetaminophen-induced liver damage in mice. *Free Radic. Biol. Med.* **89**, 918–930  
468 (2015).  
469 30. Hecker, L. *et al.* NADPH oxidase-4 mediates myofibroblast activation and fibrogenic  
470 responses to lung injury. *Nat. Med.* **15**, 1077–1081 (2009).  
471 31. Wermuth, P. J., Mendoza, F. A. & Jimenez, S. A. Abrogation of transforming growth factor-  
472  $\beta$ -induced tissue fibrosis in mice with a global genetic deletion of Nox4. *Lab. Invest.* **99**,  
473 470–482 (2019).

474

#### 475 **Acknowledgements**

476 The authors would like to acknowledge the technical support of N.S.J.Ko, S.Lim, and  
477 B.L.George.

478

#### 479 **Funding**

480 This research is supported by the National Medical Research Council (NMRC), Singapore STaR  
481 awards (NMRC/STaR/0029/2017), NMRC Centre Grant to the NHCS, MOH-CIRG18nov-0002,  
482 MRC-LMS (UK), Goh Foundation, Tanoto Foundation and a grant from the Fondation Leducq  
483 to S.A.C. A.A.W. is supported by NMRC/OFYIRG/0053/2017. C.L.D is supported by NUS-  
484 Agilent Hub for Translation and Capture (IAF-ICP I1901E0040) and NMRC GAUG16M008.  
485 P.M.Y. is supported by NMRC/CIRG/1457/2016.

486

#### 487 **Author contributions**

488 A.A.W. and S.A.C. conceived and designed the study. A.A.W., J.D, S.V., B.K.S, W.W.L.,  
489 S.G.S., J.T., M.W., and L.E.F., performed *in vitro* cell culture, cell biology and molecular  
490 biology experiments. A.A.W., J.D., B.N., J.Z., S.G.S, and J.T. performed *in vivo* studies. L.S.P.  
491 and C.L.D. performed mass spectrometry. S.G.S. and S.Y.L performed histology analysis. R.H.  
492 and A.H. performed surface plasmon resonance and competitive ELISA. S.P.C. performed  
493 computational analysis. J.W.D. provided critical reagents. A.A.W., J.D., P.M.Y., C.L.D., and  
494 S.A.C. analyzed the data. A.A.W., J.D., E.A., S.S., and S.A.C. prepared the manuscript with  
495 input from co-authors.

496

#### 497 **Competing interests**

498 S.A.C., S.S., A.A.W., B.N., B.K.S and W.W.L. are co-inventors on a number of patent  
499 applications relating to the role of IL11 in human diseases that include the published patents:  
500 WO2017103108, WO2017103108 A2, WO 2018/109174 A2, WO 2018/109170 A2. S.A.C. and  
501 S.S. are co-founders and shareholders of Enleofen Bio PTE LTD, a company (which S.A.C. is a  
502 director of) that develops anti-IL11 therapeutics.

503

#### 504 **Data and materials availability**

505 All data are provided in the manuscript or in the supplementary materials.



506 **Extended Data Figures**  
507

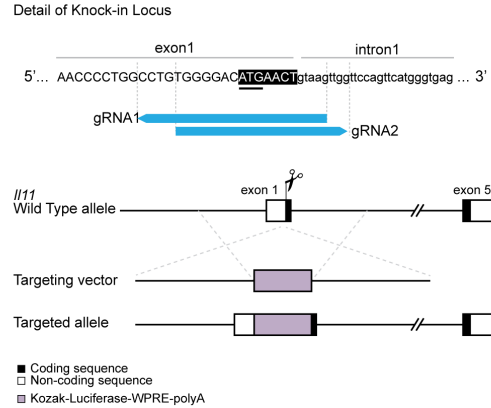

508  
509 **Extended Data Figure 1: *III1*-Luciferase knock-in mice.**  
510 Knock-in strategy for Kozak-Luciferase-WPRE-polyA into exon 1 of *III1* locus using  
511 CRISPR/Cas9. Woodchuck Hepatitis Virus (WHP) Posttranscriptional Regulatory Element  
512 (WPRE).

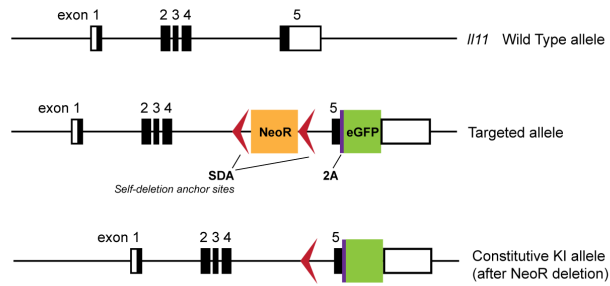

513

514 **Extended Data Figure 2: *III1*-EGFP knockin mice.**

515 Knock-in strategy for *2A-EGFP* cassette into exon 5 of *III1* gene, replacing the TGA stop codon

516 resulting in the translation of *III1*-2A-EGFP protein. The 2A linker is cleaved resulting in

517 retention of EGFP in cells that express and secrete *III1*.

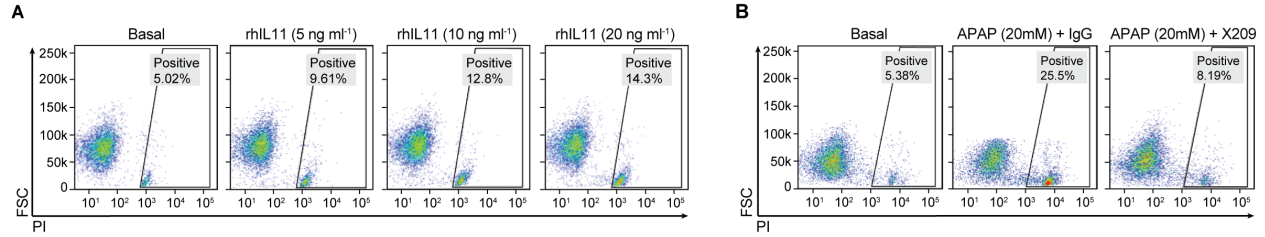

518  
519  
520  
521  
522

**Extended Data Figure 3: Hepatotoxic effects of IL11.**

Representative flow cytometry forward scatter (FSC) plots of Propidium Iodide (PI) staining of primary human hepatocytes stimulated with (A) increasing dose of rhIL11 and (B) APAP in the presence of either IgG or X209 (2  $\mu$ g ml<sup>-1</sup>).

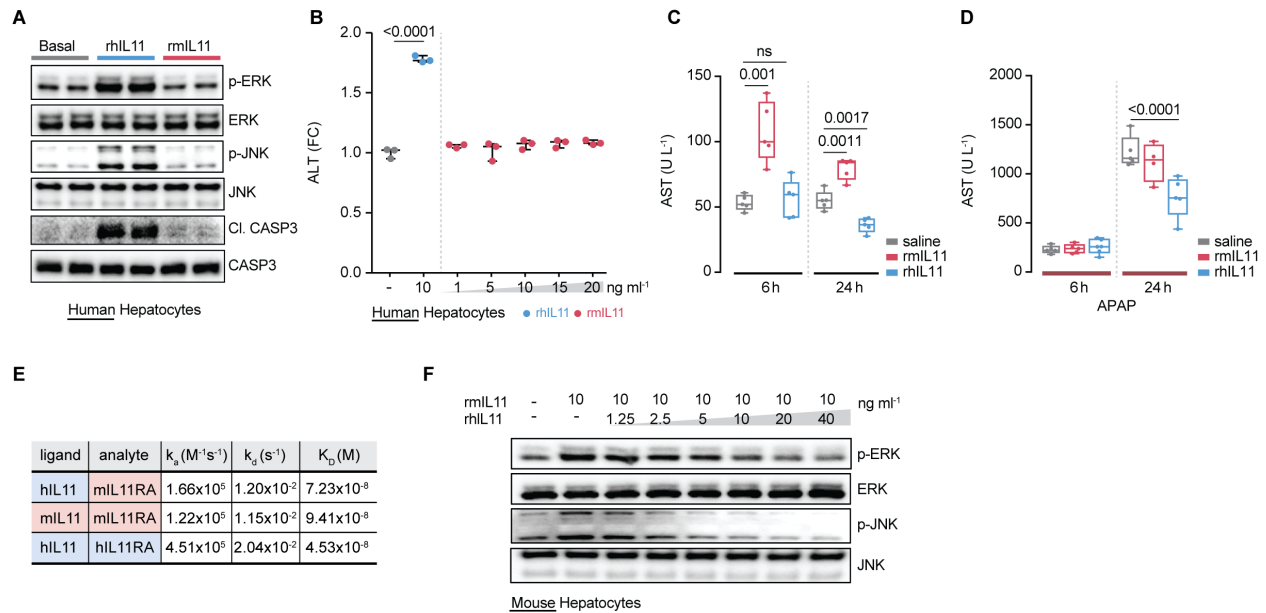

523  
524

525 **Extended Data Figure 4: Species-specific effects of human or mouse IL11 on human or**  
526 **mouse hepatocytes.**

527 (A) Effect of recombinant human IL11 (rhIL11, 10 ng ml<sup>-1</sup>) or recombinant mouse IL11  
528 (rmIL11, 10 ng ml<sup>-1</sup>) on ERK, JNK and CASP3 activation status in human hepatocytes. (B) ALT  
529 levels in the supernatant of human hepatocytes stimulated with either rhIL11 or increasing dose  
530 of rmIL11. (C) Effect of rhIL11 and rmIL11 treatment alone (Schematic Fig. 2C) or (D) with  
531 APAP administration (Schematic Fig. 2F) on serum AST levels in the mice. (E) Binding affinity  
532 and kinetic constants for mouse IL11RA interaction with either mouse IL11 or human IL11 and  
533 for human IL11RA interaction with human IL11. (F) Western blots showing dose-dependent  
534 inhibition effect of rhIL11 on p-ERK, ERK, p-JNK, JNK in mouse hepatocytes stimulated with  
535 rmIL11 (10 ng ml<sup>-1</sup>, 24h), (B) Data are shown as mean±SD; (C,D) Data are shown as box-and-  
536 whisker with median (middle line), 25th–75th percentiles (box), and minimum-maximum values  
537 (whiskers). (B) Two-tailed, Tukey-corrected Student's *t*-test; (C) two-tailed Student's *t*-test; (D)  
538 two-tailed Dunnett's test. FC: fold change.

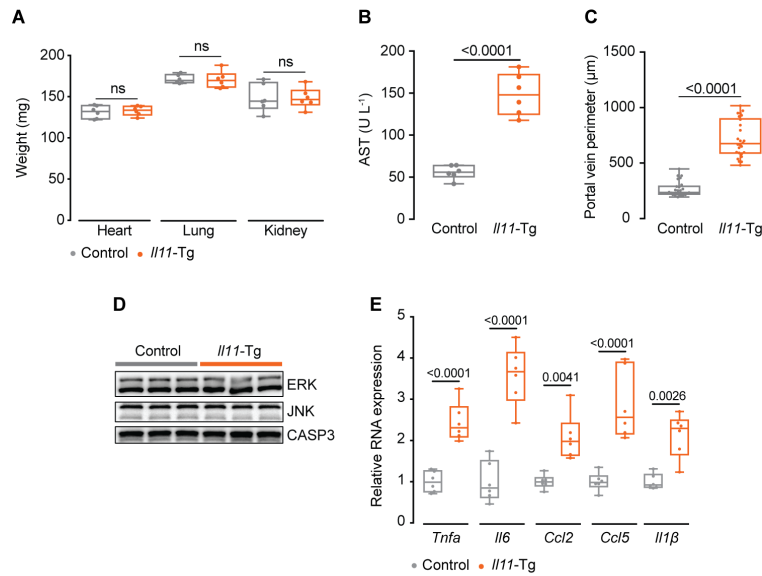

539

540

541 **Extended Data Figure 5: Hepatocyte-specific *I111* overexpression causes liver**  
542 **necroinflammation.**

543 (A) Weight of heart, lung, kidney, (B) serum AST levels, (C) quantification of portal vein  
544 diameter, (D) Western blots of total ERK, total JNK, and CASP3, and (E) relative liver mRNA  
545 expression levels of pro-inflammatory markers of control and *I111*-Tg mice (Schematic Fig. 3A).  
546 (A-C, E) Data are shown as box-and-whisker with median (middle line), 25th–75th percentiles  
547 (box), and minimum-maximum values (whiskers); two-tailed Student's *t*-test.



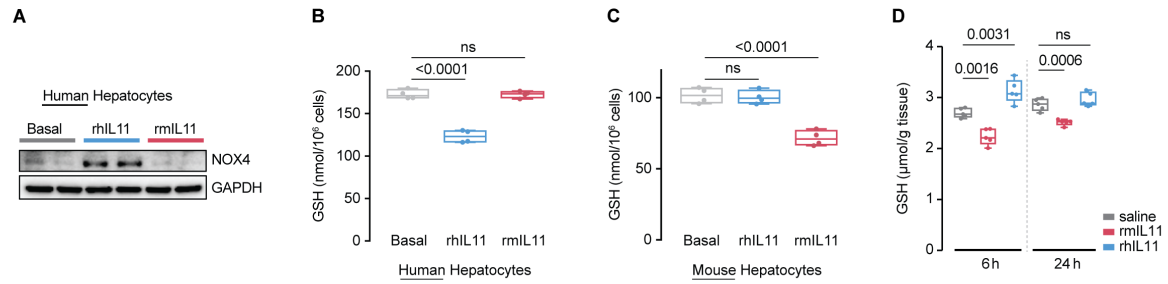

548  
549

550 **Extended Data Figure 6: Only species-specific IL11 induces NOX4 and glutathione**  
551 **depletion in hepatocytes.**

552 Effect of rhIL11 and rmIL11 (10 ng ml<sup>-1</sup>) on (A) NOX4 protein expression, (B) GSH levels in  
553 human hepatocytes, (C) GSH levels in mouse hepatocytes. (D) Hepatic GSH levels following  
554 rhIL11 or rmIL11 administration to mice (Schematic Fig. 2C) (B-D) Data are shown as box-and-  
555 whisker with median (middle line), 25th–75th percentiles (box), and minimum-maximum values  
556 (whiskers); two-tailed Dunnett's test.

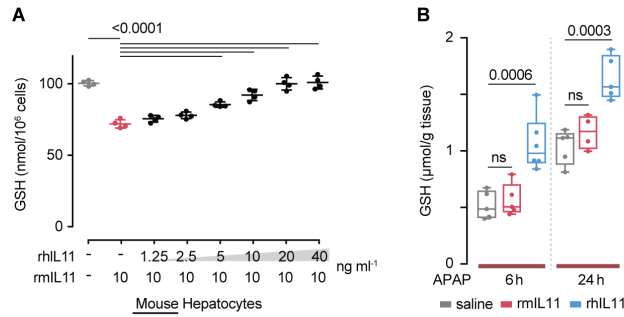

557  
558

559 **Extended Data Figure 7: Recombinant human IL11 (rhIL11) restores GSH levels in**  
560 **injured mouse liver.**

561 (A) Dose-dependent inhibition effect of rhIL11 on GSH levels in primary mouse hepatocytes  
562 stimulated with rmIL11; two-tailed, Tukey-corrected Student's *t*-test. (B) Effect of rhIL11 or  
563 rmIL11 on murine hepatic GSH levels following APAP injury, as shown in Schematic Fig. 2F;  
564 two-tailed Dunnett's test. (A, B) Data are shown as box-and-whisker with median (middle line),  
565 25th–75th percentiles (box), and minimum-maximum values (whiskers).

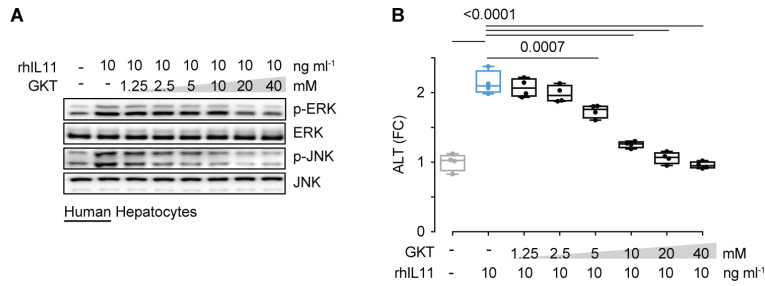

566  
567

568 **Extended Data Figure 8: The NOX4 inhibitor GKT-137831 prevents the hepatotoxic effects**  
569 **of IL11.**

570 Dose-dependent inhibition effect of GKT-137831, a NOX4 inhibitor, on (A) ERK and JNK  
571 activation and on (B) ALT secretion from human hepatocytes stimulated with rhIL11 (10 ng ml<sup>-1</sup>, 24h). (B) Data are shown as box-and-whisker with median (middle line), 25th–75th percentiles  
572 (box), and minimum-maximum values (whiskers); two-tailed, Tukey-corrected Student's *t*-test.  
573 FC: fold change.  
574

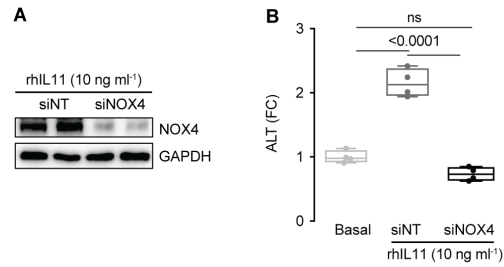

575  
576

577 **Extended Data Figure 9: NOX4 is critical for the hepatotoxic effect of IL11.**

578 (A) Western blots showing the knockdown efficiency of siNOX4. (B) Effect of siNOX4 on  
579 rhIL11-induced primary human hepatocyte death and release of ALT. (A-B) rhIL11 (10 ng ml<sup>-1</sup>),  
580 siNT (non-targeting siRNA control)/siNOX4 (50 nM); 24h; data are shown as box-and-whisker  
581 with median (middle line), 25th–75th percentiles (box), and minimum-maximum values  
582 (whiskers); two-tailed, Tukey-corrected Student's *t*-test. FC: fold change.

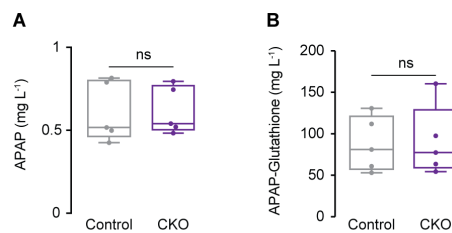

583  
584

585 **Extended Data Figure 10: Control and CKO mice have similar serum levels of APAP and**  
586 **APAP-Glutathione 24h after APAP administration.**

587 LC-MS/MS Quantification of (A) APAP and (B) APAP-Glutathione in the serum of control and  
588 CKO mice. Data are shown as box-and-whisker with median (middle line), 25th–75th percentiles  
589 (box), and minimum-maximum values (whiskers); two-tailed Student's *t*-test

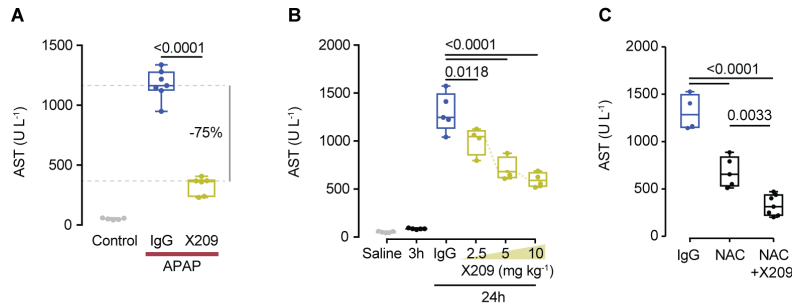

590  
591 **Extended Data Figure 11: Anti-IL11RA antibody (X209) lowers serum AST after APAP**  
592 **injury.**  
593 (A) Serum AST levels in saline and APAP mice receiving a preventive dose of X209 (10 mg kg<sup>-1</sup>), 16h prior to APAP (Schematic Fig. 5A). (B) Dose-dependent effect of X209 on serum AST  
594 levels in APAP mice receiving a therapeutic dose of X209, 3h post APAP administration  
595 (Schematic Fig. 5D, the values of saline are the same as those used in S11A). (C) Serum AST  
596 levels in mice treated with NAC (500 mg kg<sup>-1</sup>) alone or in combination with X209 (5 mg kg<sup>-1</sup>) 3h  
597 after APAP injury (Schematic Fig. 5G). (A-C) Data are shown as box-and-whisker with median  
598 (middle line), 25th–75th percentiles (box), and minimum-maximum values (whiskers); two-  
599 tailed, Tukey-corrected Student's *t*-test.  
600

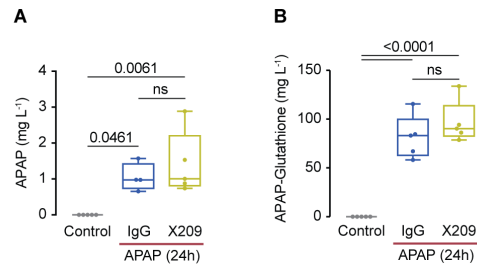

601  
602

603 **Extended Data Figure 12: Serum levels of APAP and APAP-Glutathione in the mice serum**  
604 **24h post APAP OD.**

605 LC-MS/MS Quantification of (A) APAP and (B) APAP-Glutathione in saline control mice, and  
606 in IgG and X209-treated mice 24h following APAP administration. Data are shown as box-and-  
607 whisker with median (middle line), 25th–75th percentiles (box), and minimum-maximum values  
608 (whiskers); Two-tailed, Tukey-corrected Student's *t*-test.  
609



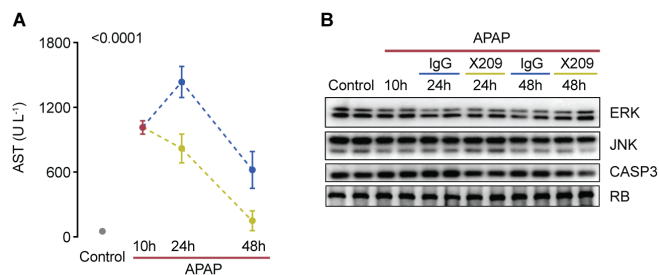

610

611

612 **Extended Data Figure 13: X209 reverses APAP-induced liver damage.**

613 (A) Serum AST levels and (B) Western blots showing hepatic content of total ERK, JNK,

614 CASP3, and RB from mice in reversal experimental groups as shown in schematic Fig. 6A.

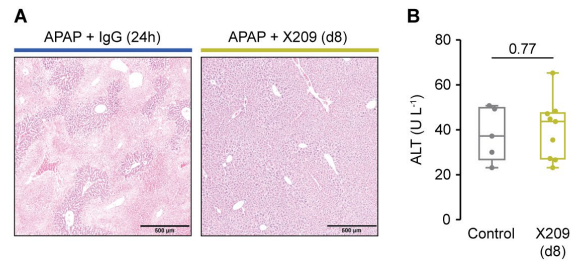

615

616 **Extended Data Figure 14: Recovery of X209-treated mice following administration of lethal**  
617 **APAP dose.**

618 (A) Representative H&E images (scale bars, 500 μm) of livers from IgG (24h post APAP) and  
619 X209-treated mice (D8 post APAP). (B) Serum ALT levels of saline-control and X209-treated  
620 mice (D8 post APAP).

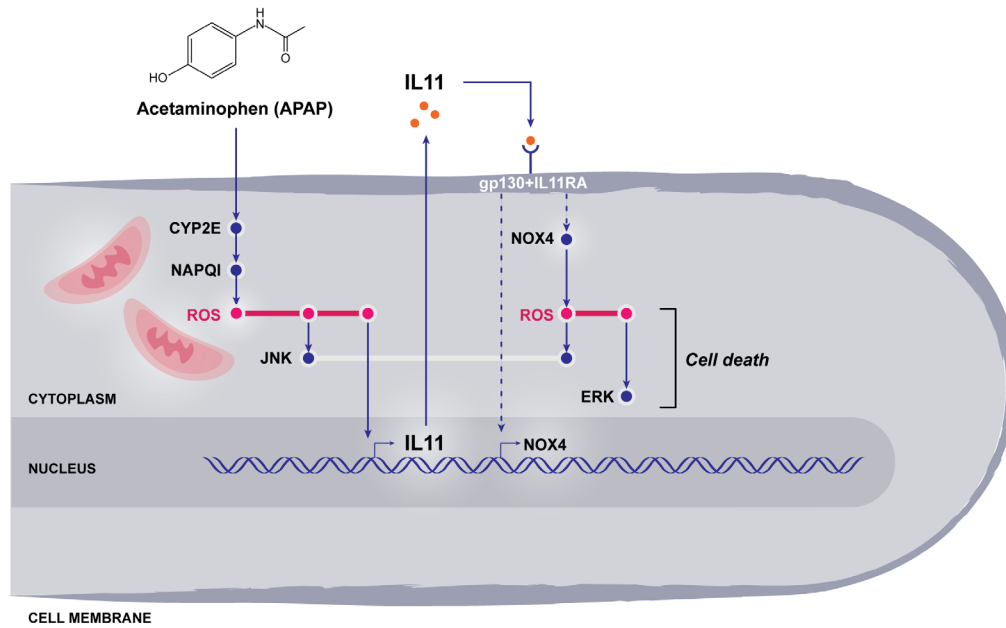

621

622 **Extended Data Figure 15: Proposed mechanism and role of IL11 in APAP-induced**  
623 **hepatotoxicity.** Metabolizing APAP in the liver leads to ROS production via NAPQI and  
624 triggers IL11 secretion. The autocrine IL11 signaling loops on hepatocytes and continues to  
625 generate ROS via NOX4, which drives sustained cell death and limits hepatic regeneration  
626 independently of APAP and its metabolites. If the IL11 pathway is blocked either genetically or  
627 therapeutically, hepatocyte cell death can be prevented and liver regeneration is restored.

**Table 1. List of publications showing protective effects of recombinant human IL11 (rhIL11) in rodent models of liver injury**

**Yu et al. 2016. "Interleukin-11 Protects Mouse Liver from Warm Ischemia/reperfusion (WI/Rp) Injury." *Clinics and Research in Hepatology and Gastroenterology* 40 (5): 562–70.**

*In vivo* administration of rhIL11 (500µg/kg, IV) prior to WI/Rp injury protects mouse livers. *In vitro*, pre-treatment with rhIL11 (2 µg/mL, 12 hours) reduces murine hepatocyte apoptosis due to hypoxia/reperfusion.

**Zhu et al. 2015. "IL-11 Attenuates Liver Ischemia/Reperfusion Injury (IRI) through STAT3 Signaling Pathway in Mice." *PloS One* 10 (5): e0126296.**

Hepatoprotective effects of rhIL11 in mice subjected to a single injection of rhIL11 (500µg/kg, IP) one hour prior to IRI. *In vitro*, murine hepatocytes were treated with 1µg/ml of rhIL11.

**Nishina et al. 2012. "Interleukin-11 Links Oxidative Stress and Compensatory Proliferation." *Science Signaling* 5 (207):ra5.**

Administration of rhIL11 receptor superagonist, (N-3N, 500µg/kg) 2 hours prior to acetaminophen (APAP) injection reduces acute liver injury in mice.

**Maeshima et al. 2004. "A Protective Role of Interleukin 11 on Hepatic Injury in Acute Endotoxemia." *Shock* 21 (2): 134–38.**

The authors conclude that rhIL11 (150µg/kg, IP) plays a significant protective role in LPS-induced hepatic injury (acute endotoxemia) in rats.

**Trepicchio et al. 2001. "Protective Effect of rhIL-11 in a Murine Model of Acetaminophen-Induced Hepatotoxicity." *Toxicologic Pathology* 29 (2): 242-249.**

The authors indicate a protective role of rhIL11 (250 or 500µg/kg, SC) against acetaminophen-induced liver damage, in which rhIL11 was injected to mice 2 hours before acetaminophen administration.

**Bozza et al. 1999. "Interleukin-11 Reduces T-Cell-Dependent Experimental Liver Injury in Mice." *Hepatology* 30 (6): 1441–47.**

Administration of rhIL11 (50-500µg/kg, IP) 2 hours prior to Concanavalin A–induced T-cell–mediated hepatotoxicity reduces liver necrosis and enhanced survival in mice.

| <b>Supplementary Table 2. List of publications showing protective and/or anti-inflammatory effects of rhIL11 in other rodent disease models</b> |                                                                                                                                                                                                                                                                                                                                                                                                                                                                                                                                                       |
|-------------------------------------------------------------------------------------------------------------------------------------------------|-------------------------------------------------------------------------------------------------------------------------------------------------------------------------------------------------------------------------------------------------------------------------------------------------------------------------------------------------------------------------------------------------------------------------------------------------------------------------------------------------------------------------------------------------------|
| <b>Bowel</b>                                                                                                                                    | <p><b>Gibson et al. 2010. "Interleukin-11 Reduces TLR4-Induced Colitis in TLR2-Deficient Mice and Restores Intestinal STAT3 Signaling." <i>Gastroenterology</i> 139 (4): 1277–88.</b></p> <p>The authors report that administration of rhIL11 (5µg/kg, IP) ameliorates infection colitis and is cytoprotective in TLR2-deficient mice.</p>                                                                                                                                                                                                            |
|                                                                                                                                                 | <p><b>Boerma et al. 2007. "Local Administration of Interleukin-11 Ameliorates Intestinal Radiation Injury in Rats." <i>Cancer Research</i> 67 (19): 9501–6.</b></p> <p>The authors conclude that IL11 ameliorates early intestinal radiation injury, in which rats were given daily injections of rhIL11 (2 mg/kg/d) from 2 days prior until 2 weeks after irradiation.</p>                                                                                                                                                                           |
|                                                                                                                                                 | <p><b>Opal et al. 2003. "Orally Administered Recombinant Human Interleukin-11 Is Protective in Experimental Neutropenic Sepsis." <i>The Journal of Infectious Diseases</i> 187 (1): 70–76.</b></p> <p>The authors suggest that IL11 maintains epithelial cell integrity during cytoreductive chemotherapy by cyclophosphamide based on effects observed in rats receiving daily oral administration of rhIL11 (0.5mg/kg/day), starting from 1 day before the first dose of cyclophosphamide for a total of 12 days.</p>                               |
|                                                                                                                                                 | <p><b>Ropeleski et al. 2003. "Interleukin-11-Induced Heat Shock Protein 25 Confers Intestinal Epithelial-Specific Cytoprotection from Oxidant Stress." <i>Gastroenterology</i> 124 (5): 1358–68.</b></p> <p>The authors conclude that IL11 confers epithelial-specific cytoprotection during intestinal epithelial injury. Rat, mouse and canine cell lines (IEC-18, YAMC, NIH3T3, MDCK-HR) were stimulated with high (50-100ng/ml) levels of rhIL11.</p>                                                                                             |
|                                                                                                                                                 | <p><b>Greenwood-Van Meerveld et al 2000. "Recombinant Human Interleukin-11 Modulates Ion Transport and Mucosal Inflammation in the Small Intestine and Colon." <i>Laboratory Investigation; a Journal of Technical Methods and Pathology</i> 80 (8): 1269–80.</b></p> <p>The authors conclude that during intestinal inflammation IL11 acts as a modulator of epithelial transport or as an anti-inflammatory cytokine based on effects of rhIL11 on rat mucosal sheets (10-10,000 ng/ml) and in rats (33µg/kg, alternate days for 1 or 2 weeks).</p> |
|                                                                                                                                                 | <p><b>Du et al 1997. "Protective Effects of Interleukin-11 in a Murine Model of Ischemic Bowel Necrosis." <i>American Journal of Physiology-Gastrointestinal and Liver Physiology</i>.</b></p> <p>Administration of rhIL11 (250 µg/kg/day) for 3 days prior to and for 7 days post bowel ischemia induction confers a protective effect against ischemic bowel necrosis and the authors suggest its use as a treatment for gastrointestinal mucosal diseases.</p>                                                                                     |
|                                                                                                                                                 | <p><b>Orazi et al. 1996. "Interleukin-11 Prevents Apoptosis and Accelerates Recovery of Small Intestinal Mucosa in Mice Treated with Combined Chemotherapy and Radiation." <i>Laboratory Investigation; a Journal of Technical Methods and Pathology</i> 75 (1): 33–42.</b></p> <p>Administration of rhIL11 (250 µg/kg) promotes recovery from chemotherapy and radiation-induced damage to the mice small intestinal mucosa.</p>                                                                                                                     |

|               |                                                                                                                                                                                                                                                                                                                                                                                                                                                                                                                                                                                                                                                                                                                                                                                                                     |
|---------------|---------------------------------------------------------------------------------------------------------------------------------------------------------------------------------------------------------------------------------------------------------------------------------------------------------------------------------------------------------------------------------------------------------------------------------------------------------------------------------------------------------------------------------------------------------------------------------------------------------------------------------------------------------------------------------------------------------------------------------------------------------------------------------------------------------------------|
|               | <p><b>Potten et al 1996. "Protection of the Small Intestinal Clonogenic Stem Cells from Radiation-Induced Damage by Pretreatment with Interleukin 11 Also Increases Murine Survival Time." <i>Stem Cells</i>.1996 14(4):452-9.</b></p> <p>RhIL11 (100µg/kg, SC), administered to mice prior to and after cytotoxic exposure, protects clonogenic cells in intestinal crypts and increases murine survival times following radiation exposure.</p>                                                                                                                                                                                                                                                                                                                                                                   |
|               | <p><b>Qiu et al. 1996. "Protection by Recombinant Human Interleukin-11 against Experimental TNB-Induced Colitis in Rats." <i>Digestive Diseases and Sciences</i> 41 (8): 1625–30.</b></p> <p>The authors describe protective effects of rhIL11 in trinitrobenzene sulfonic acid-induced colitis in rats. Rats were injected daily with rhIL11 (100, 300, or 1000µg/kg, SC) 3 days before, or daily for 3-7-14 days after TNB administration.</p> <p><b>Du et al. 1994. "A Bone Marrow Stromal-Derived Growth Factor, Interleukin-11, Stimulates Recovery of Small Intestinal Mucosal Cells after Cytoablative Therapy." <i>Blood</i> 83 (1): 33–37.</b></p> <p>Administration of rhIL11 (250µg/kg/d, SC) promotes recovery of small intestinal mucosa following combination radiation and chemotherapy in mice.</p> |
| Heart         | <p><b>Tamura et al. 2018. "The Cardioprotective Effect of Interleukin-11 against Ischemia-Reperfusion Injury in a Heart Donor Model." <i>Annals of Cardiothoracic Surgery</i> 7 (1):99-105.</b></p> <p>Administration of rhIL11 (18µg/ml, IV, 10 minutes prior to heart collection) preserves heart function and lower apoptosis index in rat following ex vivo model of cold ischemia.</p>                                                                                                                                                                                                                                                                                                                                                                                                                         |
|               | <p><b>Obana et al. 2012. "Therapeutic Administration of IL-11 Exhibits the Postconditioning Effects against Ischemia-Reperfusion Injury via STAT3 in the Heart." <i>American Journal of Physiology. Heart and Circulatory Physiology</i> 303 (5): H569–77.</b></p> <p>Administration of rhIL11 (20 µg/kg, IV at the start of reperfusion) prevents adverse cardiac remodeling and apoptosis after ischemia reperfusion injury-induced acute myocardial infarction in mice</p>                                                                                                                                                                                                                                                                                                                                       |
|               | <p><b>Obana et al. 2010. "Therapeutic Activation of Signal Transducer and Activator of Transcription 3 by Interleukin-11 Ameliorates Cardiac Fibrosis after Myocardial Infarction." <i>Circulation</i> 121 (5): 684–91.</b></p> <p>Administration of rhIL11 (8µg/kg, IV) 24 hours following left coronary artery ligation-induced myocardial infarction (MI) and then consecutively every 24 hours for 4 days reduces post-MI scar volume in mice.</p>                                                                                                                                                                                                                                                                                                                                                              |
|               | <p><b>Kimura et al. 2007. "Identification of Cardiac Myocytes as the Target of Interleukin 11, a Cardioprotective Cytokine." <i>Cytokine</i> 38 (2):107-115</b></p> <p>The authors conclude that IL11 is a cardioprotective based on effects of rhIL11 (8µg/kg) administered to mouse 15 hours prior to cardiac ischemia-reperfusion</p>                                                                                                                                                                                                                                                                                                                                                                                                                                                                            |
| Immune System | <p><b>Bozza et al. 2001. "Interleukin-11 Modulates Th1/Th2 Cytokine Production from Activated CD4 T Cells." <i>Journal of Interferon &amp; Cytokine Research</i> 21(1):21-30.</b></p> <p>The authors state that IL11 acts directly on activated murine CD4+ve T-cells and modulates, not represses, the immune response following stimulation with rhIL11 (1-500 ng/ml).</p>                                                                                                                                                                                                                                                                                                                                                                                                                                        |
|               | <p><b>Opal et al. 2000. "Recombinant Human Interleukin-11 Has Anti-inflammatory Actions Yet Does Not Exacerbate Systemic <i>Listeria</i> Infection." <i>The Journal of Infectious Diseases</i> 181(2): 754-756</b></p>                                                                                                                                                                                                                                                                                                                                                                                                                                                                                                                                                                                              |

|        |                                                                                                                                                                                                                                                                                                                                                                                                                                                                                                                                                                       |
|--------|-----------------------------------------------------------------------------------------------------------------------------------------------------------------------------------------------------------------------------------------------------------------------------------------------------------------------------------------------------------------------------------------------------------------------------------------------------------------------------------------------------------------------------------------------------------------------|
|        | <p>Daily administration of rhIL11 (150 mg/kg, IV) for 7 days prior to Listeria infection reduces interferon-<math>\gamma</math> levels. Interestingly, the authors stated that inflammatory markers IL-6/IFN-<math>\gamma</math> trend down after anti-IL11mAb (10mg/kg) treatment.</p>                                                                                                                                                                                                                                                                               |
|        | <p><b>Hill et al. 1998. "Interleukin-11 Promotes T Cell Polarization and Prevents Acute Graft-versus-Host Disease after Allogeneic Bone Marrow Transplantation." <i>The Journal of Clinical Investigation</i> 102 (1): 115–23.</b></p> <p>The authors conclude that IL11 prevents Graft-vs-Host-Disease (GVHD) via T Cell polarization, based on experiments in which a high dose of rhIL11 (250<math>\mu</math>g/kg, SC, twice daily) was injected into a murine model of GVHD.</p>                                                                                  |
|        | <p><b>Sonis et al. 1997. "Mitigating Effects of Interleukin 11 on Consecutive Courses of 5-Fluorouracil-Induced Ulcerative Mucositis in Hamsters." <i>Cytokine</i> 9 (8): 605–12.</b></p> <p>Administration of rhIL11 (50-100<math>\mu</math>g/animal/day, SC) protects from 5-fluorouracil-induced ulcerative mucositis in hamsters.</p>                                                                                                                                                                                                                             |
|        | <p><b>Trepicchio et al. 1997. "IL-11 Regulates Macrophage Effector Function through the Inhibition of Nuclear Factor-kappaB." <i>Journal of Immunology</i> 159 (11): 5661–70.</b></p> <p>The authors conclude that IL11 inhibits the secretion of pro-inflammatory cytokines by macrophages; murine primary macrophages were treated with rhIL11 (10-100 ng/ml).</p>                                                                                                                                                                                                  |
|        | <p><b>Trepicchio et al. 1996. "Recombinant Human IL-11 Attenuates the Inflammatory Response through down-Regulation of Proinflammatory Cytokine Release and Nitric Oxide Production." <i>Journal of Immunology</i> 157 (8): 3627–34.</b></p> <p>The authors report that IL11 reduces levels of TNF-<math>\alpha</math>, IL-1<math>\beta</math> and IFN-<math>\gamma</math> in the serum of LPS-treated mice and in LPS-stimulated macrophage media. Mice and murine macrophages were treated with rhIL11 (500<math>\mu</math>g/kg or 10-100 ng/ml, respectively).</p> |
| Joint  | <p><b>Anguita et al. 1999. "Selective Anti-Inflammatory Action of Interleukin-11 in Murine Lyme Disease: Arthritis Decreases While Carditis Persists." <i>The Journal of Infectious Diseases</i> 179 (3): 734–37.</b></p> <p>Administration of rhIL11(0.1-2<math>\mu</math>g/mouse/day, 5 days/week for 3 weeks) reduces arthritis, but not carditis, in <i>Borrelia burgdorferi</i>-infected mice (a murine model of Lyme disease).</p>                                                                                                                              |
|        | <p><b>Walmsley et al. 1998. "An Anti-Inflammatory Role for Interleukin-11 in Established Murine Collagen-Induced Arthritis." <i>Immunology</i> 95 (1): 31–37.</b></p> <p>Daily administration of rhIL11 (0.3-100<math>\mu</math>g/mouse/day, IP, 10 days) reduces inflammation in a murine model of collagen-induced arthritis.</p>                                                                                                                                                                                                                                   |
| Kidney | <p><b>Lee et al. 2012. "Interleukin-11 Protects against Renal Ischemia and Reperfusion Injury." <i>American Journal of Physiology. Renal Physiology</i> 303 (8): F1216–24.</b></p> <p>The authors conclude that IL11 is renoprotective based on pre-treatment (10 minutes prior to IR) and post-treatment (30-60 minutes following IR) effects of rhIL11 and PEGylated rhIL11 (100-1000<math>\mu</math>g/kg, IP) in mice.</p>                                                                                                                                         |
|        | <p><b>Stangou et al. 2011. "Effect of IL-11 on Glomerular Expression of TGF-Beta and Extracellular Matrix in Nephrotoxic Nephritis in Wistar Kyoto Rats." <i>Journal of Nephrology</i> 24 (1): 106–111.</b></p>                                                                                                                                                                                                                                                                                                                                                       |



|      |                                                                                                                                                                                                                                                                                                                                                                                  |
|------|----------------------------------------------------------------------------------------------------------------------------------------------------------------------------------------------------------------------------------------------------------------------------------------------------------------------------------------------------------------------------------|
|      | <p>Administration of rhIL11 (800-1360µg/kg, IP) 2 hours prior to nephrotoxic nephritis and then once daily for 6 days suppresses ECM deposition in rats.</p>                                                                                                                                                                                                                     |
| Lung | <p><b>Sheridan et al 1999. "Interleukin-11 Attenuates Pulmonary Inflammation and Vasomotor Dysfunction in Endotoxin-Induced Lung Injury." <i>The American Journal of Physiology</i> 277 (5): L861-67.</b></p> <p>The authors conclude that rhIL11 (200mg/kg, IP) exerts an anti-inflammatory activity that protects against LPS-induced lung injury and lethality in rats</p>    |
|      | <p><b>Waxman et al. 1998. "Targeted Lung Expression of Interleukin-11 Enhances Murine Tolerance of 100% Oxygen and Diminishes Hyperoxia-Induced DNA Fragmentation." <i>J. Clin. Invest.</i> 101(9):1970-1982</b></p> <p>The authors conclude that IL11 protects from hyperoxic-induced lung injury, based on the effects of lung-specific human IL11 overexpression in mice.</p> |

629

**Supplementary Table 3. List of publications from clinical trials where rhIL11 was administered to patients, based mainly on an inferred protective effect of rhIL11 use in rodent models of disease.**

**Herrlinger et al. 2006. "Randomized, Double Blind Controlled Trial of Subcutaneous Recombinant Human Interleukin-11 versus Prednisolone in Active Crohn's Disease." *The American Journal of Gastroenterology* 101 (4): 793–797.**

RhIL11 (1mg, weekly for 12 weeks, SC) was administered to 51 patients with active Crohn's disease and found to be significantly inferior as compared to prednisolone treatment.

**Lawitz et al. 2004. "A Pilot Study of Interleukin-11 in Subjects with Chronic Hepatitis C and Advanced Liver Disease Nonresponsive to Antiviral Therapy." *The American Journal of Gastroenterology* 99 (12): 2359–64.**

RhIL11 (5µg/kg, daily for 12 weeks, SC) was administered to 20 patients with chronic Hepatitis C and late stage liver disease. Lower serum ALT was observed by study end. The most common side effect is oedema in lower extremities, which was observed in all subjects.

**Sands et al. 2002. "Randomized, Controlled Trial of Recombinant Human Interleukin-11 in Patients with Active Crohn's Disease." *Alimentary Pharmacology & Therapeutics* 16 (3): 399–406.**

RhIL11 (15µg/kg, weekly for 6 weeks, SC) was administered to 49 patients with Crohn's disease. A greater proportion of patients receiving rhIL11 achieved remission compared to placebo. Side effects including oedema were observed.

**Moreland et al. 2001. "Results of a Phase-I/II Randomized, Masked, Placebo-Controlled Trial of Recombinant Human Interleukin-11 (rhIL-11) in the Treatment of Subjects with Active Rheumatoid Arthritis." *Arthritis Research* 3 (4): 247–252.**

Administration of up to 15µg/kg rhIL11 weekly for 12 weeks (SC) in rheumatoid arthritis patients is safe but no therapeutic benefit was observed. In addition, mild adverse effect (erythema with/without induration) at the injection site was seen in 60.6% of patients receiving rhIL11.

**Trepicchio et al. 1999. "Interleukin-11 Therapy Selectively Downregulates Type I Cytokine Proinflammatory Pathways in Psoriasis Lesions." *The Journal of Clinical Investigation* 104 (11): 1527–1537.**

Patients with extensive psoriasis were treated with 2.5 or 5mg/kg of rhIL11 (daily for 8 weeks, SC). A response (RNA expression of inflammatory markers) was observed in a subset (n=7) of 12 patients; the other 5 patients were non-responsive and no improvement was observed.
